# Supplementary material for: Vibrio parahaemolyticus from Migratory Birds in China Carries an Extra Copy of tRNA-Gly and Plasmid-Mediated Quinolone Resistance Gene qnrD
Source: PubMed Central journal article supplement (PMC10433854; doi:10.1128/spectrum.02170-22), 2023-06-01
Supplement: spectrum.02170-22-s0001.pdf [file spectrum.02170-22-s0001.pdf]

Supplementary Table 1 The information of 124 *V. parahaemolyticus* strains in this study

| Isolate name | Time   | Host                   | Sample Type | location†       | Antibiotic resistance genes                                                                 | Plasmids | mobile elements                                                 |            |                |            |            |             |            |             |             |             |             |            |             | MIC value of <i>V. parahaemolyticus</i> for antibiotics |             |           |             |             |             |            |                 |                 |  | accession number* |
|--------------|--------|------------------------|-------------|-----------------|---------------------------------------------------------------------------------------------|----------|-----------------------------------------------------------------|------------|----------------|------------|------------|-------------|------------|-------------|-------------|-------------|-------------|------------|-------------|---------------------------------------------------------|-------------|-----------|-------------|-------------|-------------|------------|-----------------|-----------------|--|-------------------|
|              |        |                        |             |                 |                                                                                             |          | Insert component                                                | Transposon | virulence gene | AK (µg/mL) | GM (µg/mL) | MEM (µg/mL) | IP (µg/mL) | CTX (µg/mL) | FEP (µg/mL) | CAZ (µg/mL) | ATM (µg/mL) | AC (µg/mL) | AMP (µg/mL) | AMC (µg/mL)                                             | SAM (µg/mL) | C (µg/mL) | CIP (µg/mL) | LVX (µg/mL) | MXF (µg/mL) | TE (µg/mL) | SXT (µg/mL)     |                 |  |                   |
| SH2-1        | 2018.1 | <i>Ardeola bacchus</i> | faeces      | OTCWP, Shenzhen | <i>bla</i> CARB-27                                                                          | none     | none                                                            | <i>tlh</i> | 16             | 8          | 0.38       | 0.38        | 0.125      | 2           | 0.25        | 0.125       | 2           | 1.5        | 8           | 1                                                       | 1.5         | 1         | 0.38        | 0.25        | 0.5         | 0.19       | 0.19            | JAQBIM000000000 |  |                   |
| SH2-2        | 2018.1 | <i>Ardeola bacchus</i> | faeces      | OTCWP, Shenzhen | <i>bla</i> CARB-27                                                                          | none     | none                                                            | <i>tlh</i> | 24             | 3          | 0.064      | 0.125       | 1.5        | 0.25        | 0.19        | 1           | 1.5         | 1          | 8           | 1                                                       | 1.5         | 1         | 0.38        | 0.047       | 0.38        | 0.19       | 0.38            | JAQBIN000000000 |  |                   |
| SH4-3        | 2018.1 | <i>Ardeola bacchus</i> | faeces      | OTCWP, Shenzhen | <i>bla</i> CARB-27                                                                          | none     | none                                                            | <i>tlh</i> | 12             | 12         | 0.5        | 0.19        | 0.125      | 0.47        | 0.19        | 2           | 8           | 2          | 1           | 0.75                                                    | 1.5         | 0.38      | 0.19        | 0.75        | 0.125       | 0.19       | JAQBO000000000  |                 |  |                   |
| SH5-1        | 2018.1 | <i>Ardeola bacchus</i> | faeces      | OTCWP, Shenzhen | <i>bla</i> CARB-27                                                                          | none     | none                                                            | <i>tlh</i> | 16             | 4          | 0.25       | 0.19        | 0.125      | 0.5         | 0.25        | 1.5         | 12          | 6          | 1           | 0.75                                                    | 1           | 0.19      | 0.25        | 0.75        | 0.19        | 0.19       | JAQBI000000000  |                 |  |                   |
| SH7-1        | 2018.1 | <i>Mallard</i>         | faeces      | OTCWP, Shenzhen | <i>bla</i> CARB-25                                                                          | none     | none                                                            | <i>tlh</i> | 8              | 3          | 0.125      | 0.19        | 0.064      | 0.75        | 0.19        | 2           | 32          | 6          | 1           | 0.75                                                    | 12          | 0.38      | 0.25        | 0.38        | 0.19        | 0.125      | JAQBH000000000  |                 |  |                   |
| SH7-2        | 2019.3 | <i>Mallard</i>         | faeces      | OTCWP, Shenzhen | <i>bla</i> CARB-43                                                                          | none     | none                                                            | <i>Tn7</i> | 8              | 6          | 0.094      | 0.38        | 0.094      | 0.38        | 0.064       | 1.5         | 4           | 8          | 1           | 0.19                                                    | 0.75        | 0.38      | 0.19        | 0.75        | 0.25        | 0.19       | JAQBIR000000000 |                 |  |                   |
| SH8-1        | 2018.1 | <i>Mallard</i>         | faeces      | OTCWP, Shenzhen | <i>bla</i> CARB-25                                                                          | none     | none                                                            | <i>tlh</i> | 8              | 3          | 0.016      | 0.25        | 0.38       | 0.4         | 0.064       | 2           | 12          | 32         | 1           | 1.5                                                     | 0.75        | 0.38      | 0.19        | 0.38        | 0.19        | 0.094      | JAQBIS000000000 |                 |  |                   |
| SH8-2        | 2018.1 | <i>Mallard</i>         | faeces      | OTCWP, Shenzhen | <i>bla</i> CARB-35                                                                          | none     | none                                                            | <i>tlh</i> | 12             | 2          | 0.19       | 0.19        | 0.125      | 0.5         | 0.125       | 1.5         | 8           | 6          | 1           | 0.75                                                    | 1           | 0.38      | 0.19        | 0.19        | 0.125       | 0.19       | JAQBIT000000000 |                 |  |                   |
| SH10-3       | 2018.1 | <i>Mallard</i>         | faeces      | OTCWP, Shenzhen | <i>bla</i> CARB-25, <i>qnrD1</i>                                                            | pCol3M   | IS5, IS256, IS3, IS4, IS481                                     | none       | <i>tlh</i>     | 4          | 1.5        | 0.125       | 0.19       | 0.094       | 0.47        | 0.094       | 2           | 0.75       | 1           | 0.75                                                    | 1           | 0.38      | 0.38        | 0.38        | 0.19        | 0.19       | JAQBIV000000000 |                 |  |                   |
| SH10-4       | 2018.1 | <i>Mallard</i>         | faeces      | OTCWP, Shenzhen | <i>bla</i> CARB-29                                                                          | none     | none                                                            | <i>tlh</i> | 12             | 3          | 0.5        | 0.3         | 0.094      | 0.5         | 0.094       | 2           | 12          | 24         | 1           | 1.5                                                     | 12          | 0.38      | 0.25        | 1.5         | 0.19        | 0.19       | JAQBIV000000000 |                 |  |                   |
| SH11-1       | 2018.1 | <i>Mallard</i>         | faeces      | OTCWP, Shenzhen | <i>bla</i> CARB-29                                                                          | none     | none                                                            | <i>tlh</i> | 8              | 2          | 0.016      | 0.125       | 0.047      | 0.5         | 0.064       | 2           | 0.5         | 1          | 1           | 0.25                                                    | 1           | 0.38      | 0.25        | 0.25        | 0.125       | 0.125      | JAQBIV000000000 |                 |  |                   |
| SH13-1       | 2018.1 | <i>Mallard</i>         | faeces      | OTCWP, Shenzhen | <i>bla</i> CARB-25, <i>qnrD1</i>                                                            | pCol3M   | ISL3, IS3, IS481, IS5                                           | none       | <i>tlh</i>     | 32         | 2          | 0.25        | 0.19       | 0.094       | 0.5         | 0.064       | 1           | 3          | 6           | 1                                                       | 0.75        | 0.75      | 0.38        | 0.125       | 1.5         | 0.19       | 0.19            | JAQBIX000000000 |  |                   |
| SH14-1       | 2018.1 | <i>Mallard</i>         | faeces      | OTCWP, Shenzhen | <i>bla</i> CARB-25                                                                          | none     | none                                                            | <i>tlh</i> | 6              | 2          | 0.016      | 0.19        | 0.094      | 0.5         | 0.094       | 1           | 3           | 1.5        | 1           | 0.5                                                     | 0.75        | 0.38      | 0.094       | 0.38        | 0.19        | 0.19       | JAQBIY000000000 |                 |  |                   |
| SH14-2       | 2018.1 | <i>Mallard</i>         | faeces      | OTCWP, Shenzhen | <i>bla</i> CARB-25, <i>qnrD1</i>                                                            | pCol3M   | IS630, IS5                                                      | none       | <i>tlh</i>     | 24         | 2          | 0.25        | 0.19       | 0.094       | 0.75        | 0.125       | 2           | 1.5        | 2           | 1                                                       | 0.75        | 12        | 0.19        | 0.25        | 1.5         | 0.19       | 0.25            | JAQBIZ000000000 |  |                   |
| SH15-1       | 2018.1 | <i>Mallard</i>         | faeces      | OTCWP, Shenzhen | <i>bla</i> CARB-46                                                                          | none     | none                                                            | <i>tlh</i> | 12             | 3          | 0.016      | 0.19        | 0.125      | 0.75        | 0.25        | 1           | 8           | 32         | 1           | 1.5                                                     | 1           | 0.38      | 0.25        | 0.5         | 0.38        | 0.125      | JAQBI000000000  |                 |  |                   |
| SH15-2       | 2018.1 | <i>Mallard</i>         | faeces      | OTCWP, Shenzhen | <i>bla</i> CARB-25, <i>qnrD1</i>                                                            | pCol3M   | ISL3, IS3, IS5                                                  | none       | <i>tlh</i>     | 16         | 4          | 0.75        | 0.19       | 0.094       | 0.38        | 0.047       | 1           | 2          | 4           | 0.19                                                    | 1           | 0.125     | 0.094       | 0.25        | 1.5         | 0.19       | 1               | JAQBIB000000000 |  |                   |
| SH16-1       | 2018.1 | <i>Mallard</i>         | faeces      | OTCWP, Shenzhen | <i>bla</i> CARB-46                                                                          | none     | none                                                            | <i>tlh</i> | 8              | 3          | 0.064      | 0.5         | 0.064      | 0.5         | 0.125       | 2           | 256         | 256        | 1           | 4                                                       | 1           | 0.19      | 0.125       | 0.38        | 0.1         | 0.125      | JAQBIC000000000 |                 |  |                   |
| SH16-2       | 2018.1 | <i>Mallard</i>         | faeces      | OTCWP, Shenzhen | <i>bla</i> CARB-25, <i>qnrD1</i>                                                            | pCol3M   | IS481                                                           | none       | <i>tlh</i>     | 12         | 3          | 0.19        | 1          | 0.094       | 0.5         | 0.094       | 2           | 6          | 8           | 1                                                       | 4           | 8         | 0.38        | 0.25        | 1.5         | 0.19       | 0.19            | JAQBID000000000 |  |                   |
| FT2-1        | 2018.1 | <i>Mallard</i>         | faeces      | FRFR, Shenzhen  | <i>bla</i> CARB-29                                                                          | none     | none                                                            | <i>tlh</i> | 16             | 3          | 0.016      | 0.19        | 0.125      | 1           | 0.125       | 1           | 6           | 12         | 1           | 1                                                       | 1           | 0.38      | 0.25        | 0.19        | 0.38        | 0.094      | JAQBIG000000000 |                 |  |                   |
| FT2-2        | 2018.1 | <i>Mallard</i>         | faeces      | FRFR, Shenzhen  | <i>bla</i> CARB-38                                                                          | none     | none                                                            | <i>tlh</i> | 12             | 3          | 0.016      | 0.19        | 0.064      | 0.5         | 0.094       | 2           | 0.19        | 0.19       | 1           | 0.25                                                    | 1           | 0.38      | 0.125       | 0.38        | 0.19        | 0.094      | JAQBII000000000 |                 |  |                   |
| FT3-1        | 2018.1 | <i>Mallard</i>         | faeces      | FRFR, Shenzhen  | <i>bla</i> CARB-38                                                                          | none     | none                                                            | <i>tlh</i> | 8              | 3          | 0.032      | 0.19        | 0.064      | 0.38        | 0.25        | 2           | 24          | 16         | 1           | 3                                                       | 8           | 0.19      | 0.125       | 0.38        | 1.5         | 0.094      | JAQBII000000000 |                 |  |                   |
| FT3-2        | 2018.1 | <i>Mallard</i>         | faeces      | FRFR, Shenzhen  | <i>bla</i> CARB-31                                                                          | none     | none                                                            | <i>tlh</i> | 16             | 3          | 0.047      | 0.38        | 0.064      | 0.75        | 0.25        | 1           | 32          | 256        | 1           | 3                                                       | 8           | 0.38      | 0.125       | 0.5         | 1           | 0.125      | JAQBII000000000 |                 |  |                   |
| FT8-1        | 2018.1 | <i>Ardeola bacchus</i> | faeces      | FRFR, Shenzhen  | <i>bla</i> CARB-35                                                                          | none     | none                                                            | <i>tlh</i> | 16             | 3          | 0.047      | 0.125       | 0.094      | 0.75        | 0.125       | 1           | 1.5         | 2          | 1           | 0.75                                                    | 0.75        | 0.19      | 0.75        | 0.38        | 0.19        | 0.094      | JAQBII000000000 |                 |  |                   |
| FT8-2        | 2018.1 | <i>Ardeola bacchus</i> | faeces      | FRFR, Shenzhen  | <i>bla</i> CARB-43                                                                          | none     | none                                                            | <i>tlh</i> | 8              | 3          | 0.19       | 0.19        | 0.094      | 0.5         | 0.094       | 1           | 6           | 6          | 1           | 0.75                                                    | 1           | 0.38      | 0.19        | 0.38        | 0.19        | 0.094      | JAQBIL000000000 |                 |  |                   |
| 1-1          | 2019.3 | <i>Charadriiformes</i> | faeces      | OTCWP, Shenzhen | <i>bla</i> CARB-26                                                                          | none     | none                                                            | <i>tlh</i> | 32             | 6          | 0.016      | 0.19        | 1.5        | 1           | 8           | 2           | 1.5         | 12         | 1.5         | 1                                                       | 1           | 0.38      | 0.25        | 0.38        | 0.19        | 0.094      | JAQBJE000000000 |                 |  |                   |
| 1-2          | 2019.3 | <i>Charadriiformes</i> | faeces      | OTCWP, Shenzhen | <i>bla</i> CARB-33                                                                          | none     | IS110, IS1595, IS200, IS605, IS21, IS256, IS3, IS481, IS5, ISL3 | <i>Tn7</i> | <i>tlh</i>     | 16         | 2          | 0.016       | 0.19       | 0.047       | 0.25        | 0.19        | 2           | 8          | 12          | 2                                                       | 1           | 1         | 0.016       | 0.094       | 0.5         | 0.125      | 0.094           | JAQBJE000000000 |  |                   |
| 2-1          | 2019.3 | <i>Charadriiformes</i> | faeces      | OTCWP, Shenzhen | <i>bla</i> CARB-33                                                                          | none     | IS110, IS200, IS605, IS256, IS3, IS481, IS5, ISL3               | none       | <i>tlh</i>     | 16         | 4          | 0.016       | 0.19       | 0.047       | 0.25        | 0.38        | 1.5         | 12         | 12          | 1                                                       | 0.19        | 0.38      | 0.25        | 0.38        | 0.125       | 0.19       | JAQBJE000000000 |                 |  |                   |
| 3-1          | 2019.3 | <i>Mallard</i>         | faeces      | OTCWP, Shenzhen | <i>bla</i> CARB-47                                                                          | none     | IS3, IS5, ISL3                                                  | none       | <i>tlh</i>     | 32         | 8          | 0.016       | 0.19       | 0.125       | 0.25        | 0.125       | 1.5         | 4          | 8           | 1                                                       | 1.5         | 0.125     | 0.125       | 0.38        | 0.38        | 0.19       | JAQBII000000000 |                 |  |                   |
| 3-2          | 2019.3 | <i>Mallard</i>         | faeces      | OTCWP, Shenzhen | <i>bla</i> CARB-31, <i>bla</i> CARB-44                                                      | none     | none                                                            | <i>tlh</i> | 6              | 3          | 0.016      | 0.19        | 0.094      | 0.25        | 0.094       | 1.5         | 24          | 32         | 1.5         | 1                                                       | 0.75        | 0.25      | 0.25        | 0.19        | 0.125       | 0.125      | JAQBII000000000 |                 |  |                   |
| 4-1          | 2019.3 | <i>Charadriiformes</i> | faeces      | OTCWP, Shenzhen | <i>bla</i> CARB-22, <i>bla</i> CARB-35, <i>bla</i> CARB-38, <i>bla</i> CARB-47, <i>qnrC</i> | none     | ISL3, IS110, IS3, IS5                                           | none       | <i>tlh</i>     | 6          | 1.5        | 0.016       | 0.19       | 0.094       | 0.75        | 0.094       | 1           | 6          | 32          | 1.5                                                     | 1           | 0.75      | 0.125       | 0.25        | 0.38        | 0.19       | 0.125           | JAQBII000000000 |  |                   |
| 4-2          | 2019.3 | <i>Charadriiformes</i> | faeces      | OTCWP, Shenzhen | <i>bla</i> CARB-22, <i>bla</i> CARB-35, <i>bla</i> CARB-38, <i>bla</i> CARB-47, <i>qnrC</i> | none     | ISL3, IS110, IS3, IS5                                           | none       | <i>tlh</i>     | 6          | 3          | 0.016       | 0.19       | 0.094       | 0.5         | 0.125       | 1           | 4          | 8           | 2                                                       | 0.75        | 1         | 0.016       | 0.25        | 0.25        | 0.19       | 0.094           | JAQBII000000000 |  |                   |
| 5-1          | 2019.3 | <i>Mallard</i>         | faeces      | OTCWP, Shenzhen | <i>bla</i> CARB-46                                                                          | none     | none                                                            | <i>tlh</i> | 16             | 6          | 0.016      | 0.19        | 0.125      | 0.75        | 0.25        | 1.5         | 6           | 32         | 1           | 1                                                       | 0.38        | 0.19      | 0.38        | 0.19        | 0.094       | 0.19       | JAQBJL000000000 |                 |  |                   |
| 5-2          | 2019.3 | <i>Mallard</i>         | faeces      | OTCWP, Shenzhen | <i>bla</i> CARB-38                                                                          | none     | none                                                            | <i>tlh</i> | 16             | 6          | 0.016      | 0.19        | 0.064      | 0.25        | 0.064       | 2           | 24          | 32         | 1           | 0.75                                                    | 0.75        | 0.38      | 0.016       | 0.38        | 0.19        | 0.19       | 0.19            | JAQBJM000000000 |  |                   |
| 6-1          | 2019.3 | <i>Mallard</i>         | faeces      | OTCWP, Shenzhen | <i>bla</i> CARB-33                                                                          | none     | IS110, IS1595, IS200, IS605, IS21, IS256, IS3, IS481, IS5, ISL3 | <i>Tn7</i> | <i>tlh</i>     | 32         | 8          | 0.016       | 0.19       | 0.125       | 0.25        | 0.125       | 2           | 24         | 8           | 1                                                       | 1.5         | 0.19      | 0.19        | 0.38        | 0.19        | 0.125      | JAQBJN000000000 |                 |  |                   |
| 6-2          | 2019.3 | <i>Mallard</i>         | faeces      | OTCWP, Shenzhen | <i>bla</i> CARB-33                                                                          | none     | none                                                            | <i>tlh</i> | 6              | 3          | 0.016      | 0.19        | 1.5        | 0.25        | 0.19        | 1.5         | 1           | 16         | 1.5         | 0.75                                                    | 1           | 0.38      | 0.25        | 0.19        | 0.19        | 0.125      | JAQBJO00000000  |                 |  |                   |
| 7-1          | 2019.3 | <i>Mallard</i>         | faeces      | OTCWP, Shenzhen | <i>bla</i> CARB-48                                                                          | none     | none                                                            | <i>tlh</i> | 12             | 4          | 0.016      | 0.19        | 0.094      | 0.25        | 0.094       | 1.5         | 24          | 32         | 2           | 1.5                                                     | 1           | 0.38      | 0.19        | 0.75        | 0.38        | 0.125      | JAQBJP000000000 |                 |  |                   |
| 7-2          | 2019.3 | <i>Mallard</i>         | faeces      | OTCWP, Shenzhen | <i>bla</i> CARB-21, <i>bla</i> CARB-33                                                      | none     | IS3, IS481, IS66                                                | none       | <i>tlh</i>     | 8          | 1.5        | 0.016       | 0.38       | 0.047       | 0.38        | 0.19        | 1           | 8          | 32          | 1                                                       | 1           | 0.38      | 0.047       | 0.5         | 0.125       | 0.125      | JAQBJQ000000000 |                 |  |                   |
| 8-1          | 2019.3 | <i>Mallard</i>         | faeces      | OTCWP, Shenzhen | <i>bla</i> CARB-29, <i>qnrC</i>                                                             | none     | ISL3, IS110, IS200, IS605, IS21, IS3, IS630                     | none       | <i>tlh</i>     | 8          | 1.5        | 0.016       | 0.38       | 0.047       | 0.38        | 0.25        | 1.5         | 8          | 8           | 1                                                       | 0.75        | 0.19      | 0.38        | 0.19        | 0.38        | 0.125      | 0.19            | JAQBIR000000000 |  |                   |
| 8-2          | 2019.3 | <i>Mallard</i>         | faeces      | OTCWP, Shenzhen | <i>bla</i> CARB-25, <i>bla</i> CARB-35, <i>bla</i> CARB-47                                  | none     | IS1595, IS3, IS30, ISNCYC                                       | none       | <i>tlh</i>     | 12         | 1.5        | 0.016       | 0.19       | 0.38        | 0.75        | 1           | 8           | 24         | 2           | 1.5                                                     | 1           | 0.38      | 0.25        | 0.75        | 0.19        | 0.125      | 0.19            | JAQBIS000000000 |  |                   |
| 9-1          | 2019.3 | <i>Charadriiformes</i> | faeces      | OTCWP, Shenzhen | <i>bla</i> CARB-29, <i>bla</i> CARB-33, <i>bla</i> CARB-41                                  | none     | none                                                            | <i>tlh</i> | 6              | 3          | 0.016      | 0.19        | 1.5        | 2           | 8           | 2           | 24          | 24         | 1.5         | 1.5                                                     | 1.5</       |           |             |             |             |            |                 |                 |  |                   |

| Isolate name | Time   | Host                   | Sample Type | location† | Antibiotic resistance genes                           | Plasmids | mobile elements                                 |            | virulence gene | MIC value of <i>V. parahaemolyticus</i> for antibiotics |            |             |            |             |             |             |             |            |             |             |             |           |             | accession number* |             |             |            |                 |
|--------------|--------|------------------------|-------------|-----------|-------------------------------------------------------|----------|-------------------------------------------------|------------|----------------|---------------------------------------------------------|------------|-------------|------------|-------------|-------------|-------------|-------------|------------|-------------|-------------|-------------|-----------|-------------|-------------------|-------------|-------------|------------|-----------------|
|              |        |                        |             |           |                                                       |          | Insert component                                | Transposon |                | AK (µg/mL)                                              | GM (µg/mL) | MEM (µg/mL) | IP (µg/mL) | CTX (µg/mL) | FEP (µg/mL) | CAZ (µg/mL) | ATM (µg/mL) | AC (µg/mL) | AMP (µg/mL) | AMC (µg/mL) | SAM (µg/mL) | C (µg/mL) | CIP (µg/mL) |                   | LVX (µg/mL) | MXF (µg/mL) | TE (µg/mL) | SXT (µg/mL)     |
| Z14-2        | 2019.3 | <i>Ardeola bacchus</i> | faeces      | Zhanjiang | <i>blaCARB-46</i>                                     | none     | IS110,IS21,IS256,IS3,IS481,IS5,IS630,IS66,ISL3  | Tn7        | <i>tlh</i>     | 16                                                      | 8          | 0.016       | 0.19       | 0.094       | 0.5         | 0.094       | 1           | 4          | 12          | 1           | 2           | 1         | 0.38        | 0.25              | 0.19        | 0.19        | 0.125      | JAQBM000000000  |
| Z19-1        | 2019.3 | <i>Ardeola bacchus</i> | faeces      | Zhanjiang | <i>blaCARB-46</i>                                     | none     | IS110,IS21,IS256,IS3,IS481,IS5,IS630,IS66,ISL3  | Tn7        | <i>tlh</i>     | 6                                                       | 3          | 0.016       | 0.19       | 0.094       | 0.5         | 0.094       | 2           | 3          | 8           | 0.5         | 2           | 1         | 0.38        | 0.25              | 0.19        | 0.19        | 0.125      | JAQBMZ000000000 |
| L2-1         | 2019.3 | <i>Ardeola bacchus</i> | faeces      | Leizhou   | <i>blaCARB-33</i>                                     | none     | none                                            | none       | <i>tlh</i>     | 24                                                      | 2          | 0.016       | 0.19       | 0.094       | 0.75        | 0.094       | 2           | 8          | 32          | 1           | 1           | 1         | 0.38        | 0.25              | 0.38        | 0.19        | 0.19       | JAQBMF000000000 |
| L14-1        | 2019.3 | <i>Ardeola bacchus</i> | faeces      | Leizhou   | <i>blaCARB-26</i>                                     | none     | IS1595,IS200,IS605,IS4,IS481,ISL3,ISNCY         | none       | <i>tlh</i>     | 16                                                      | 6          | 0.016       | 0.19       | 0.047       | 0.5         | 0.125       | 2           | 4          | 32          | 1           | 1           | 1         | 0.38        | 0.25              | 0.38        | 0.19        | 0.125      | JAQBMF000000000 |
| L14-2        | 2019.3 | <i>Ardeola bacchus</i> | faeces      | Leizhou   | <i>blaCARB-26</i>                                     | none     | IS1595,IS4,IS481,ISL3,ISNCY                     | none       | <i>tlh</i>     | 16                                                      | 6          | 0.016       | 0.19       | 0.094       | 0.5         | 0.094       | 2           | 2          | 12          | 1           | 2           | 1         | 0.38        | 0.25              | 0.38        | 0.19        | 0.125      | JAQBMG000000000 |
| L15-1        | 2019.3 | <i>Ardeola bacchus</i> | faeces      | Leizhou   | <i>blaCARB-33</i>                                     | none     | none                                            | none       | <i>tlh</i>     | 8                                                       | 2          | 0.016       | 0.19       | 0.25        | 0.25        | 0.125       | 2           | 6          | 24          | 1           | 2           | 0.75      | 0.38        | 0.125             | 0.38        | 0.38        | 0.25       | JAQBMH000000000 |
| L20-1        | 2019.3 | <i>Ardeola bacchus</i> | faeces      | Leizhou   | <i>blaCARB-33</i>                                     | none     | none                                            | none       | <i>tlh</i>     | 16                                                      | 6          | 0.016       | 0.19       | 0.094       | 0.25        | 0.094       | 2           | 2          | 12          | 0.5         | 2           | 1         | 0.38        | 0.25              | 0.38        | 0.19        | 0.19       | JAQBMJ000000000 |
| L21-1        | 2019.3 | <i>Ardeola bacchus</i> | faeces      | Leizhou   | <i>blaCARB-20</i>                                     | none     | ISL3                                            | none       | <i>tlh</i>     | 16                                                      | 3          | 0.016       | 0.19       | 2           | 4           | 4           | 2           | 6          | 32          | 1           | 2           | 1         | 0.38        | 0.38              | 0.19        | 0.19        | 0.19       | JAQBMK000000000 |
| L23-1        | 2019.3 | <i>Charadriiformes</i> | faeces      | Leizhou   | <i>blaCARB-26</i>                                     | none     | IS1595,IS4,IS481,ISL3,ISNCY                     | none       | <i>tlh</i>     | 16                                                      | 6          | 0.016       | 0.19       | 1.5         | 4           | 4           | 2           | 6          | 32          | 1           | 1           | 1         | 0.38        | 0.25              | 0.38        | 0.19        | 0.19       | JAQBMK000000000 |
| L23-2        | 2019.3 | <i>Charadriiformes</i> | faeces      | Leizhou   | <i>blaCARB-26</i>                                     | none     | IS1595,IS4,IS481,ISL3,ISNCY                     | none       | <i>tlh</i>     | 8                                                       | 3          | 0.016       | 0.38       | 0.094       | 0.5         | 0.38        | 2           | 6          | 24          | 1           | 1           | 1         | 0.38        | 0.25              | 0.19        | 0.19        | 0.25       | JAQBML000000000 |
| L26-1        | 2019.3 | <i>Charadriiformes</i> | faeces      | Leizhou   | <i>blaCARB-26, sul2, tet(S9)</i>                      | none     | IS91,IS1595,IS200,IS605,IS30,IS4,IS481,IS5,IS66 | none       | <i>tlh</i>     | 16                                                      | 6          | 0.016       | 0.19       | 0.094       | 0.5         | 0.094       | 2           | 6          | 32          | 1           | 3           | 1         | 0.38        | 0.25              | 0.38        | 0.19        | 0.19       | JAQBMN000000000 |
| L28-1        | 2019.3 | <i>Charadriiformes</i> | faeces      | Leizhou   | <i>blaCARB-25, blaCARB-29, blaCARB-33, blaCARB-41</i> | none     | IS1595,IS3,IS4,IS481,ISL3,ISNCY                 | none       | <i>tlh</i>     | 16                                                      | 6          | 0.016       | 0.19       | 0.094       | 0.5         | 0.094       | 2           | 2          | 6           | 0.5         | 1           | 1         | 0.38        | 0.25              | 0.38        | 0.19        | 0.19       | JAQBMN000000000 |
| L29-1        | 2019.3 | <i>Charadriiformes</i> | faeces      | Leizhou   | <i>blaCARB-26</i>                                     | none     | IS1959,IS4,IS481,ISL3,ISNCY                     | none       | <i>tlh</i>     | 16                                                      | 6          | 0.016       | 0.19       | 0.094       | 0.75        | 0.094       | 2           | 4          | 24          | 1           | 2           | 1         | 0.38        | 0.25              | 0.38        | 0.19        | 0.125      | JAQBMO000000000 |

† OCTWP=Overseas Chinese Town Wetland Park; FRFR=Futian Red Forest Reserve

\* AK=Amikacin; GM=Gentamicin; MEM=Meropenem; IP=Imipenem; CTX=Cefotaxime; FEP=Cefepime; CAZ=Ceftazidime; ATM=Aztreonam; AC=Amoxicillin; AMP=Ampicillin; AMC=Amoxicillin/clavulanic acid; SAM=Ampicillin/sulbactam; C=Chloramphenicol; CIP=Ciprofloxacin; LVX=Levofloxacin; MXF=Moxifloxacin; TE=Tetracycline; SXT=Trimethoprim/sulfamethoxazole

The yellow area: the MIC value of the strains showed intermediate resistance to antibiotics

The red area: the MIC value of the strains showed resistance to antibiotics

The white area: the MIC value of the strains showed sensitive to antibiotics

The blue area: CLSI standards were not applicable, it was impossible to determine whether they were resistant or sensitive



| Isolate name | dnaE | gyrB | recA | dtds | pntA | pyrC | tnaA | ST      |
|--------------|------|------|------|------|------|------|------|---------|
| 27-1         | 44   | 73   | 181  | 530  | 18   | 45   | 51   | ST-2725 |
| 42-1         |      |      |      |      |      |      |      |         |
| 7-2          | 44   | 130  | 87   | 110  | 56   | 37   | 63   | ST-2097 |
| 5-1          | 47   | 58   | 53   | 19   | 50   | 37   | 26   | ST-162  |
| L2-1         |      |      |      |      |      |      |      |         |
| L15-1        | 51   | 4    | 77   | 84   | 60   | 8    | 33   | ST-658  |
| L20-1        |      |      |      |      |      |      |      |         |
| 8-2          | 51   | 4    | 77   | 76   | 60   | 173  | 33   | ST-2423 |
| 24-1         | 51   | 29   | 77   | 13   | 60   | 8    | 33   | ST-356  |
| 11-1         | 51   | 555  | 61   | 76   | 23   | 457  | 76   | ST-2445 |
| Z11-1        | 60   | 49   | 89   | 539  | 18   | 216  | 318  | ST-2726 |
| 7-1          | 60   | 67   | 4    | 53   | 43   | 63   | 23   | ST-104  |
| Z14-1        | 60   | 186  | 287  | 351  | 78   | 36   | 226  | ST-2697 |
| 25-2         | 71   | 257  | 183  | 9    | 132  | 26   | 26   | ST-2698 |
| Z11-2        | 92   | 261  | 25   | 540  | 50   | 73   | 26   | ST-2727 |
| 21-1         | 103  | 3    | 89   | 3    | 72   | 82   | 2    | ST-200  |
| 34-1         | 111  | 602  | 453  | 541  | 306  | 71   | 248  | ST-2728 |
| SH15-1       | 112  | 104  | 23   | 447  | 18   | 490  | 26   | ST-2729 |
| L21-1        | 116  | 147  | 89   | 76   | 45   | 184  | 26   | ST-2699 |
| 29-2         | 123  | 100  | 127  | 29   | 66   | 11   | 31   | ST-2026 |
| 40-1         | 123  | 232  | 61   | 73   | 26   | 45   | 57   | ST-2700 |
| SH8-2        | 132  | 600  | 31   | 350  | 28   | 491  | 26   | ST-2730 |
| SH2-1        |      |      |      |      |      |      |      |         |
| SH2-2        | 133  | 136  | 3    | 537  | 43   | 63   | 12   | ST-2731 |
| SH4-3        |      |      |      |      |      |      |      |         |
| 39-1         | 137  | 124  | 411  | 76   | 128  | 194  | 195  | ST-2701 |
| 35-1         |      |      |      |      |      |      |      |         |
| 35-2         | 139  | 8    | 78   | 543  | 60   | 69   | 57   | ST-2732 |
| SH5-1        | 144  | 92   | 69   | 114  | 54   | 71   | 192  | ST-804  |
| 31-2         | 148  | 8    | 181  | 74   | 142  | 8    | 320  | ST-2733 |
| 17-1         | 153  | 191  | 70   | 19   | 23   | 8    | 1    | ST-355  |
| 38-2         | 154  | 603  | 74   | 544  | 78   | 495  | 132  | ST-2734 |
| 23-1         | 158  | 23   | 153  | 74   | 66   | 493  | 33   | ST-2735 |
| 34-2         | 167  | 68   | 454  | 542  | 307  | 46   | 13   | ST-2736 |
| SH10-3       | 175  | 530  | 168  | 169  | 130  | 17   | 73   | ST-2126 |
| SH10-4       | 175  | 598  | 25   | 150  | 26   | 78   | 258  | ST-2752 |
| F7-2         |      |      |      |      |      |      |      |         |
| L14-1        |      |      |      |      |      |      |      |         |
| L14-2        | 175  | 598  | 25   | 150  | 26   | 78   | 33   | ST-2738 |
| L23-1        |      |      |      |      |      |      |      |         |
| L23-2        |      |      |      |      |      |      |      |         |
| L29-1        |      |      |      |      |      |      |      |         |
| F7-1         | 175  | 597  | 89   | 29   | 18   | 96   | 140  | ST-2737 |
| L28-1        | 175  | 598  | 445  | 13   | 26   | 78   | 33   | ST-2739 |
| SH7-2        | 179  | 232  | 58   | 27   | 125  | 5    | 26   | ST-2702 |
| 12-1         | 185  | 217  | 441  | 151  | 2    | 37   | 9    | ST-2689 |
| 25-1         | 190  | 15   | 31   | 55   | 18   | 58   | 23   | ST-1353 |

| Isolate name | dnaE | gyrB | recA | dtds | pntA | pyrC | tnaA | ST      |
|--------------|------|------|------|------|------|------|------|---------|
| SH8-1        |      |      |      |      |      |      |      |         |
| SH15-2       | 191  | 187  | 446  | 185  | 4    | 77   | 57   | ST-2740 |
| 3-1          |      |      |      |      |      |      |      |         |
| 4-1          |      |      |      |      |      |      |      |         |
| 4-2          | 193  | 261  | 109  | 106  | 50   | 10   | 23   | ST-2703 |
| 13-2         | 221  | 298  | 31   | 55   | 26   | 23   | 37   | ST-2690 |
| 20-2         | 236  | 25   | 449  | 74   | 43   | 231  | 12   | ST-2741 |
| 15-2         | 250  | 2    | 59   | 309  | 26   | 11   | 26   | ST-2691 |
| SH13-1       | 265  | 371  | 273  | 217  | 23   | 238  | 146  | ST-2706 |
| 23-2         | 291  | 177  | 19   | 125  | 18   | 175  | 26   | ST-2704 |
| L26-1        | 305  | 139  | 24   | 5    | 195  | 27   | 94   | ST-1275 |
| 29-1         | 356  | 25   | 145  | 27   | 244  | 343  | 17   | ST-2705 |
| SH14-1       |      |      |      |      |      |      |      |         |
| 31-1         |      |      |      |      |      |      |      |         |
| 32-1         | 356  | 230  | 72   | 535  | 63   | 489  | 105  | ST-2742 |
| 32-2         |      |      |      |      |      |      |      |         |
| SH7-1        |      |      |      |      |      |      |      |         |
| 16-1         |      |      |      |      |      |      |      |         |
| 18-1         | 366  | 498  | 102  | 90   | 26   | 319  | 207  | ST-2707 |
| 26-1         |      |      |      |      |      |      |      |         |
| 15-1         | 372  | 357  | 361  | 85   | 6    | 37   | 24   | ST-1865 |
| 24-2         | 382  | 136  | 61   | 180  | 31   | 212  | 54   | ST-2708 |
| 37-1         | 442  | 4    | 70   | 191  | 165  | 17   | 29   | ST-2751 |
| 16-2         | 436  | 82   | 67   | 110  | 18   | 11   | 54   | ST-2744 |
| SH16-1       |      |      |      |      |      |      |      |         |
| SH16-2       | 439  | 89   | 25   | 536  | 47   | 3    | 38   | ST-2748 |
| 20-1         | 440  | 285  | 448  | 19   | 26   | 133  | 84   | ST-2749 |
| FT3-2        | 438  | 408  | 3    | 110  | 305  | 393  | 315  | ST-2746 |
| Z8-1         | 438  | 408  | 178  | 110  | 26   | 244  | 315  | ST-2747 |
| 6-2          | 437  | 595  | 53   | 532  | 50   | 37   | 12   | ST-2745 |
| 27-2         | 441  | 601  | 194  | 89   | 26   | 46   | 143  | ST-2750 |

**Supplementary Table 3 The information of each 464 non-bird-carried representative *V. parahaemolyticus* strains**

| Type    | Strain ID          | Year | Location                  | Sample type   | Source    | Population | Accession Number |
|---------|--------------------|------|---------------------------|---------------|-----------|------------|------------------|
| Gly-4TR | RIMD 2210633       | 1996 | Japan                     | Clinical      | Stool     | VppAsia    | GCA_000196095.1  |
| Gly-4TR | Ba94C2             | 2015 | NA                        | Environmental | Shellfish | VppAsia    | SRR3987381       |
| Gly-4TR | TUMSAT_H10_S6      | NA   | Thailand                  | Environmental | Shellfish | VppAsia    | GCA_000591555.1  |
| Gly-4TR | TUMSAT_D06_S3      | NA   | Thailand                  | Environmental | Shellfish | VppAsia    | GCA_000591495.1  |
| Gly-4TR | EKP-008            | NA   | NA                        | Environmental | NA        | VppAsia    | GCA_000510585.2  |
| Gly-4TR | CDC_K4557          | 2006 | USA: LA                   | Clinical      | Stool     | VppAsia    | GCA_000430425.1  |
| Gly-4TR | CFSAN007444        | 2012 | USA: MD                   | Clinical      | Wound     | VppAsia    | GCA_000707065.2  |
| Gly-4TR | CFSAN007457        | 2010 | USA: MD                   | Environmental | Shellfish | VppX       | GCA_000707085.2  |
| Gly-4TR | CFSAN007459        | 2010 | USA: MD                   | Environmental | Shellfish | VppX       | GCA_000707185.2  |
| Gly-4TR | 13-028A3           | 2013 | Vietnam                   | Environmental | Shellfish | VppAsia    | GCA_000737635.1  |
| Gly-4TR | NCKU_TV_5HP        | 1999 | Thailand                  | Environmental | Shellfish | VppAsia    | GCA_000736315.1  |
| Gly-4TR | NCKU_CV_CHN        | 2010 | China                     | Environmental | Shellfish | VppX       | GCA_000736325.1  |
| Gly-4TR | UCM-V493           | NA   | spain                     | Environmental | NA        | VppAsia    | GCA_000568495.1  |
| Gly-4TR | FORC_004           | 2014 | SouthKorea: Busan         | Environmental | Water     | VppX       | GCA_001433415.1  |
| Gly-4TR | FORC_006           | 2014 | SouthKorea: Gyeongnam     | Environmental | Others    | VppAsia    | GCA_001304775.1  |
| Gly-4TR | FORC_008           | 2014 | SouthKorea: Gyeongnam     | Environmental | Fish      | VppAsia    | GCA_001244315.1  |
| Gly-4TR | T9109              | 2007 | Canada: British Columbia  | Clinical      | NA        | VppAsia    | GCA_000786845.1  |
| Gly-4TR | CHN25              | 2011 | China: Shanghai           | Environmental | NA        | VppAsia    | GCA_001700835.1  |
| Gly-4TR | 07-2965            | 2007 | Canada: Alberta           | Clinical      | NA        | VppAsia    | GCA_000960565.1  |
| Gly-4TR | 09-4681            | 2009 | Canada: New Brunswick     | Clinical      | NA        | VppX       | GCA_000972025.1  |
| Gly-4TR | FORC_023           | 2014 | SouthKorea: Pusan         | Clinical      | Others    | VppAsia    | GCA_001758605.1  |
| Gly-4TR | ISF-25-6           | 2010 | Canada                    | Environmental | Shellfish | VppX       | GCA_001267595.1  |
| Gly-4TR | RM-13-3            | 2015 | Canada                    | Environmental | Shellfish | VppAsia    | GCA_001267965.1  |
| Gly-4TR | RM-17-6            | 2015 | Canada                    | Environmental | Shellfish | VppX       | GCA_001267655.1  |
| Gly-4TR | S195-7             | 2007 | Canada                    | Environmental | Others    | VppX       | GCA_001268005.1  |
| Gly-4TR | S349-10            | 2010 | Canada                    | Environmental | Others    | VppAsia    | GCA_001268015.1  |
| Gly-4TR | S383-6             | 2011 | Canada                    | Environmental | Others    | VppX       | GCA_001267625.1  |
| Gly-4TR | ISF-29-3           | 2011 | Canada                    | Environmental | Shellfish | VppAsia    | GCA_001273575.1  |
| Gly-4TR | ISF-77-01          | 2011 | Canada                    | Environmental | Shellfish | VppAsia    | GCA_001270285.1  |
| Gly-4TR | ISF-94-1           | 2011 | Canada                    | Environmental | Shellfish | VppAsia    | GCA_001280645.1  |
| Gly-4TR | S487-4             | 2013 | Canada                    | Environmental | Shellfish | VppAsia    | GCA_001270215.1  |
| Gly-4TR | CFSAN018755        | 2002 | Spain                     | Environmental | NA        | VppAsia    | GCA_001695935.1  |
| Gly-4TR | CFSAN018756        | 2003 | Spain                     | Environmental | NA        | VppAsia    | GCA_001696005.1  |
| Gly-4TR | CFSAN018758        | 1999 | Peru                      | Clinical      | Stool     | VppAsia    | GCA_001696055.1  |
| Gly-4TR | CFSAN018765        | 2004 | USA                       | Environmental | NA        | VppX       | GCA_001696165.1  |
| Gly-4TR | NSV_5736           | NA   | USA                       | Clinical      | NA        | VppX       | GCA_001471485.2  |
| Gly-4TR | FORC_022           | NA   | SouthKorea                | Environmental | Shellfish | VppAsia    | GCA_001879585.1  |
| Gly-4TR | A4EZ703            | 2004 | Canada: British Columbia  | Clinical      | Stool     | VppX       | GCA_001584415.1  |
| Gly-4TR | 05-4792            | 2005 | Canada: Alberta           | Clinical      | Stool     | VppX       | GCA_001609435.1  |
| Gly-4TR | C150               | 2008 | Canada: British Columbia  | Clinical      | Stool     | VppAsia    | GCA_001601695.1  |
| Gly-4TR | 04-2192            | 2004 | Canada: Saskatchewan      | Clinical      | Stool     | VppAsia    | GCA_001609555.1  |
| Gly-4TR | 04-2550            | 2004 | Canada: Ontario           | Clinical      | Stool     | VppX       | GCA_001610595.1  |
| Gly-4TR | A3EZ936            | 2003 | Canada: British Columbia  | Clinical      | Stool     | VppAsia    | GCA_001609175.1  |
| Gly-4TR | 1682               | 2004 | Norway                    | Clinical      | Wound     | VppAsia    | GCA_001951115.1  |
| Gly-4TR | MVP1               | 2016 | Malaysia: Negeri Sembilan | Environmental | NA        | VppAsia    | GCA_001996365.1  |
| Gly-4TR | GIMxtf283-2012.12  | 2012 | China: Shenzhen           | Environmental | Shellfish | VppAsia    | GCA_001913695.1  |
| Gly-4TR | GIMxtfL88-2011.05  | 2011 | China: Shenzhen           | Clinical      | Stool     | VppAsia    | GCA_001921805.1  |
| Gly-4TR | PY233              | 2006 | Spain                     | Environmental | NA        | VppAsia    | SRR5163844       |
| Gly-4TR | OJL90_2nd          | 2007 | Spain                     | Environmental | NA        | VppAsia    | SRR6410788       |
| Gly-4TR | CFSAN045070_113477 | 2015 | Spain: Galicia            | Clinical      | NA        | VppAsia    | SRR5163834       |
| Gly-4TR | 14-1072-D-VP       | NA   | NA                        | NA            | NA        | VppAsia    | SRR5639920       |
| Gly-4TR | C21-1262-07        | 2007 | Peru                      | Clinical      | NA        | VppAsia    | SRR6410782       |
| Gly-4TR | A3_6               | 2014 | China: Henan              | Environmental | Fish      | VppAsia    | NNQM00000000     |
| Gly-4TR | B1_7               | 2014 | China: Hubei              | Environmental | Fish      | VppAsia    | NNPQ00000000     |
| Gly-4TR | B2_10              | 2014 | China: Hubei              | Environmental | Fish      | VppAsia    | NNPE00000000     |
| Gly-4TR | B5_6               | 2014 | China: Hubei              | Environmental | Fish      | VppAsia    | NNNW00000000     |
| Gly-4TR | C10_4              | 2014 | China: Zhejiang           | Environmental | Water     | VppAsia    | NNMA00000000     |
| Gly-4TR | C3_7               | 2014 | China: Shandong           | Environmental | Water     | VppAsia    | NNLN00000000     |
| Gly-4TR | C3_9               | 2014 | China: Shandong           | Environmental | Water     | VppAsia    | NNLM00000000     |
| Gly-4TR | C6_8               | 2014 | China: Shandong           | Environmental | Fish      | VppAsia    | NNKL00000000     |
| Gly-4TR | D1_1               | 2014 | China: Sichuan            | Environmental | Sediment  | VppAsia    | NNJT00000000     |
| Gly-4TR | D1_7               | 2014 | China: Sichuan            | Environmental | Fish      | VppAsia    | NNJQ00000000     |
| Gly-4TR | E10_9              | 2014 | China: Zhejiang           | Environmental | Shellfish | VppAsia    | NNHO00000000     |
| Gly-4TR | E4_2               | 2014 | China: Zhejiang           | Environmental | Fish      | VppX       | NNHG00000000     |
| Gly-4TR | F10_3              | 2014 | China: Guangxi            | Environmental | Fish      | VppAsia    | NNGJ00000000     |
| Gly-4TR | F10_9              | 2014 | China: Guangxi            | Environmental | Fish      | VppAsia    | NNGD00000000     |
| Gly-4TR | F6_2               | 2014 | China: Guangxi            | Environmental | Water     | VppAsia    | NNEO00000000     |

| Type    | Strain ID     | Year | Location              | Sample type   | Source    | Population | Accession Number |
|---------|---------------|------|-----------------------|---------------|-----------|------------|------------------|
| Gly-4TR | F6_3          | 2014 | China: Guangxi        | Environmental | Water     | VppAsia    | NNEN0000000      |
| Gly-4TR | G1_1          | 2014 | China: Guangxi        | Environmental | Fish      | VppAsia    | NNDE0000000      |
| Gly-4TR | ATCC-17802    | 1951 | Japan                 | Environmental | Fish      | VppAsia    | GCA_001558495.2  |
| Other   | CFSAN018752   | 1998 | Spain                 | Clinical      | Stool     | VppAsia    | GCA_001695955.1  |
| Other   | TUMSAT_H01_S4 | NA   | Thailand              | Environmental | Shellfish | VppUS1     | GCA_000591515.1  |
| Other   | VP2007-007    | NA   | NA                    | Environmental | NA        | VppUS1     | GCA_000558925.2  |
| Other   | VPTS-2009     | NA   | NA                    | Environmental | NA        | VppAsia    | GCA_000593325.2  |
| Other   | AQ3810        | NA   | NA                    | Environmental | NA        | VppAsia    | GCA_000582905.2  |
| Other   | VPTS-2010     | NA   | NA                    | Environmental | NA        | VppAsia    | GCA_000593345.2  |
| Other   | VPTS-2010_2   | NA   | NA                    | Environmental | NA        | VppUS2     | GCA_000593365.2  |
| Other   | VPCR-2009     | NA   | NA                    | Environmental | NA        | VppAsia    | GCA_000593305.2  |
| Other   | FDA_R31       | 2007 | USA: LA               | Environmental | Shellfish | VppUS2     | GCA_000430405.1  |
| Other   | S001          | NA   | Thailand              | Clinical      | NA        | VppAsia    | GCA_000492095.1  |
| Other   | S002          | 1999 | China: Taiwan         | Clinical      | NA        | VppAsia    | GCA_000492075.1  |
| Other   | S015          | 1992 | China: Taiwan         | Clinical      | NA        | VppAsia    | GCA_000491875.1  |
| Other   | S017          | 1992 | China: Taiwan         | Clinical      | NA        | VppAsia    | GCA_000491835.1  |
| Other   | S022          | 1984 | Japan                 | Clinical      | NA        | VppAsia    | GCA_000491735.1  |
| Other   | S023          | 1994 | China: Taiwan         | Clinical      | NA        | VppAsia    | GCA_000491715.1  |
| Other   | S024          | 1998 | China: Taiwan         | Clinical      | NA        | VppAsia    | GCA_000491695.1  |
| Other   | S028          | NA   | Thailand              | Clinical      | NA        | VppAsia    | GCA_000491615.1  |
| Other   | S029          | 1981 | Spain                 | Environmental | NA        | VppAsia    | GCA_000491595.1  |
| Other   | S039          | NA   | China: Taiwan         | Clinical      | NA        | VppAsia    | GCA_000491395.1  |
| Other   | S040          | 1990 | Thailand              | Clinical      | NA        | VppAsia    | GCA_000491375.1  |
| Other   | S042          | 1984 | Japan                 | Clinical      | NA        | VppAsia    | GCA_000491335.1  |
| Other   | S043          | NA   | Thailand              | Clinical      | NA        | VppAsia    | GCA_000491315.1  |
| Other   | S046          | 1982 | Spain                 | Environmental | NA        | VppX       | GCA_000491255.1  |
| Other   | S047          | 1981 | Spain                 | Environmental | NA        | VppAsia    | GCA_000491235.1  |
| Other   | S048          | 1997 | USA                   | Environmental | NA        | VppX       | GCA_000491215.1  |
| Other   | S052          | 1975 | Spain                 | Environmental | NA        | VppUS1     | GCA_000491175.1  |
| Other   | S053          | 1990 | Thailand              | Clinical      | NA        | VppAsia    | GCA_000491155.1  |
| Other   | S058          | 1970 | Japan                 | Clinical      | NA        | VppAsia    | GCA_000491055.1  |
| Other   | S060          | 1992 | China: Taiwan         | Clinical      | NA        | VppAsia    | GCA_000491035.1  |
| Other   | S093          | 1998 | Japan                 | Clinical      | NA        | VppAsia    | GCA_000490485.1  |
| Other   | S096          | 1999 | Korea                 | Clinical      | NA        | VppAsia    | GCA_000493225.1  |
| Other   | S097          | 1992 | China: Taiwan         | Clinical      | NA        | VppX       | GCA_000490415.1  |
| Other   | S100          | 1990 | USA                   | Environmental | NA        | VppUS1     | GCA_000490375.1  |
| Other   | S105          | 1984 | Japan                 | Clinical      | NA        | VppAsia    | GCA_000490315.1  |
| Other   | S108          | 1990 | Thailand              | Clinical      | NA        | VppAsia    | GCA_000490275.1  |
| Other   | S115          | 1991 | Thailand              | Clinical      | NA        | VppAsia    | GCA_000490135.1  |
| Other   | S118          | 1984 | Japan                 | Clinical      | NA        | VppAsia    | GCA_000490075.1  |
| Other   | S119          | 1999 | China: Taiwan         | Clinical      | NA        | VppAsia    | GCA_000490055.1  |
| Other   | S121          | NA   | Thailand              | Clinical      | NA        | VppAsia    | GCA_000490015.1  |
| Other   | S122          | 1999 | India                 | Clinical      | NA        | VppAsia    | GCA_000489995.1  |
| Other   | S128          | 1999 | India                 | Clinical      | NA        | VppAsia    | GCA_000489895.1  |
| Other   | S134          | 2005 | China: Liaoning       | Clinical      | NA        | VppAsia    | GCA_000489775.1  |
| Other   | S139          | 2006 | China: inter Mongolia | Environmental | NA        | VppAsia    | GCA_000489675.1  |
| Other   | S140          | 2006 | China: Shandong       | Environmental | NA        | VppAsia    | GCA_000489655.1  |
| Other   | S141          | 2006 | China: Shandong       | Environmental | NA        | VppAsia    | GCA_000489635.1  |
| Other   | S142          | 2006 | China: Shandong       | Environmental | NA        | VppAsia    | GCA_000489615.1  |
| Other   | S145          | 2006 | China: inter Mongolia | Environmental | NA        | VppAsia    | GCA_000489555.1  |
| Other   | S146          | 2006 | China: inter Mongolia | Environmental | NA        | VppAsia    | GCA_000489535.1  |
| Other   | S147          | 2006 | China: inter Mongolia | Environmental | NA        | VppAsia    | GCA_000489515.1  |
| Other   | S148          | 2006 | China: inter Mongolia | Environmental | NA        | VppAsia    | GCA_000489495.1  |
| Other   | S152          | 2006 | China: Shandong       | Environmental | NA        | VppAsia    | GCA_000489435.1  |
| Other   | S159          | 2006 | China: Shandong       | Environmental | NA        | VppAsia    | GCA_000489295.1  |
| Other   | S161          | 2006 | China: Shandong       | Environmental | NA        | VppAsia    | GCA_000489255.1  |
| Other   | S162          | 2007 | Thailand              | Environmental | NA        | VppAsia    | GCA_000489235.1  |
| Other   | S164          | 2007 | USA                   | Environmental | NA        | VppAsia    | GCA_000489195.1  |
| Other   | S165          | 2007 | China: Shandong       | Environmental | NA        | VppAsia    | GCA_000489175.1  |
| Other   | S166          | 2007 | China: Shandong       | Environmental | NA        | VppAsia    | GCA_000489155.1  |
| Other   | S168          | 2007 | China: Shandong       | Environmental | NA        | VppAsia    | GCA_000489115.1  |
| Other   | S171          | 2007 | China: Shandong       | Environmental | NA        | VppAsia    | GCA_000489075.1  |
| Other   | S172          | 2007 | China: Shandong       | Environmental | NA        | VppAsia    | GCA_000489055.1  |
| Other   | S173          | 2007 | China: Shandong       | Environmental | NA        | VppAsia    | GCA_000489035.1  |
| Other   | S174          | 2007 | China: Shandong       | Environmental | NA        | VppAsia    | GCA_000489015.1  |
| Other   | GCSL_R7       | 2007 | USA: TX               | Environmental | Shellfish | VppX       | GCA_001726195.1  |
| Other   | GCSL_R13      | 2007 | USA: LA               | Environmental | Shellfish | VppAsia    | GCA_001726255.1  |
| Other   | GCSL_R17      | 2007 | USA: FL               | Environmental | Shellfish | VppAsia    | GCA_001726275.1  |

| Type  | Strain ID   | Year | Location                 | Sample type   | Source    | Population | Accession Number |
|-------|-------------|------|--------------------------|---------------|-----------|------------|------------------|
| Other | GCSL_R26    | 2007 | USA: NJ                  | Environmental | Shellfish | VppUS1     | GCA_001726335.1  |
| Other | GCSL_R29    | 2007 | USA: FL                  | Environmental | Shellfish | VppUS1     | GCA_001726325.1  |
| Other | GCSL_R32    | 2007 | USA: LA                  | Environmental | Shellfish | VppUS2     | GCA_001726445.1  |
| Other | GCSL_R45    | 2007 | USA: WA                  | Environmental | Shellfish | VppUS1     | GCA_001726495.1  |
| Other | GCSL_R52    | 2007 | USA: WA                  | Environmental | Shellfish | VppAsia    | GCA_001726565.1  |
| Other | GCSL_R60    | 2007 | USA: ME                  | Environmental | Shellfish | VppAsia    | GCA_001726695.1  |
| Other | GCSL_R62    | 2007 | USA: ME                  | Environmental | Shellfish | VppUS2     | GCA_001726725.1  |
| Other | GCSL_R63    | 2007 | USA: ME                  | Environmental | Shellfish | VppAsia    | GCA_001726735.1  |
| Other | GCSL_R65    | 2007 | USA: ME                  | Environmental | Shellfish | VppUS2     | GCA_001726755.1  |
| Other | GCSL_R74    | 2007 | USA: VA                  | Environmental | Shellfish | VppAsia    | GCA_001726775.1  |
| Other | GCSL_R77    | 2007 | USA: VA                  | Environmental | Shellfish | VppAsia    | GCA_001726845.1  |
| Other | GCSL_R86    | 2007 | USA: FL                  | Environmental | Shellfish | VppUS1     | GCA_001726885.1  |
| Other | GCSL_R88    | 2007 | USA: FL                  | Environmental | Shellfish | VppAsia    | GCA_001726895.1  |
| Other | GCSL_R111   | 2007 | Canada: PEI              | Environmental | Shellfish | VppUS1     | GCA_001727065.1  |
| Other | GCSL_R125   | 2007 | USA: FL                  | Environmental | Shellfish | VppUS2     | GCA_001727045.1  |
| Other | GCSL_R126   | 2007 | USA: FL                  | Environmental | Shellfish | VppAsia    | GCA_001727105.1  |
| Other | GCSL_R129   | 2007 | USA: FL                  | Environmental | Shellfish | VppUS2     | GCA_001727115.1  |
| Other | GCSL_R130   | 2007 | USA: FL                  | Environmental | Shellfish | VppAsia    | GCA_001975475.1  |
| Other | GCSL_R131   | 2007 | USA: FL                  | Environmental | Shellfish | VppX       | GCA_001727125.1  |
| Other | GCSL_R135   | 2007 | USA: SC                  | Environmental | Shellfish | VppAsia    | GCA_001727155.1  |
| Other | GCSL_R138   | 2007 | USA: SC                  | Environmental | Shellfish | VppUS2     | GCA_001727205.1  |
| Other | GCSL_R143   | 2007 | USA: FL                  | Environmental | Shellfish | VppUS1     | GCA_001727265.1  |
| Other | GCSL_R145   | 2007 | USA: FL                  | Environmental | Shellfish | VppUS1     | GCA_001727295.1  |
| Other | CDC_K4556R  | 2006 | USA: LA                  | Clinical      | Wound     | VppAsia    | GCA_001727365.1  |
| Other | CDC_K4558G  | 2006 | USA: LA                  | Clinical      | Wound     | VppUS1     | GCA_00172735.1   |
| Other | CDC_K4764D  | 2006 | USA: VA                  | Clinical      | Stool     | VppAsia    | GCA_001727975.1  |
| Other | CDC_K4842   | 2006 | USA: MD                  | Clinical      | Stool     | VppAsia    | GCA_001727995.1  |
| Other | CDC_K4857G  | 2007 | USA: HI                  | Clinical      | Stool     | VppAsia    | GCA_001728045.1  |
| Other | CDC_K4858   | 2006 | USA: HI                  | Clinical      | Stool     | VppAsia    | GCA_001728085.1  |
| Other | CDC_K4981   | 2007 | USA: OK                  | Clinical      | NA        | VppUS2     | GCA_001728125.1  |
| Other | CDC_K5059W  | 2007 | USA: TX                  | Clinical      | NA        | VppAsia    | GCA_001728235.1  |
| Other | CDC_K5125   | 2007 | USA: MS                  | Clinical      | NA        | VppAsia    | GCA_001728295.1  |
| Other | CDC_K5126   | 2007 | USA: MS                  | Clinical      | Stool     | VppUS1     | GCA_001728325.1  |
| Other | CDC_K5323G  | NA   | USA: VA                  | Clinical      | NA        | VppAsia    | GCA_001727475.1  |
| Other | CDC_K5324W  | 2007 | USA: VA                  | Clinical      | Stool     | VppUS2     | GCA_001727405.1  |
| Other | CDC_K5328   | NA   | USA: IN                  | Clinical      | Stool     | VppX       | GCA_001727665.1  |
| Other | CDC_K5635   | 2007 | USA: MD                  | Clinical      | Wound     | VppX       | GCA_001728725.1  |
| Other | 970107      | 1997 | USA                      | Environmental | Water     | VppAsia    | GCA_000510605.2  |
| Other | PCV08-7     | 2008 | Malaysia: Selangor       | Environmental | Others    | VppAsia    | GCA_000347495.1  |
| Other | VIP4-0219   | 2006 | China: Hong Kong         | Environmental | Fish      | VppAsia    | GCA_000500525.1  |
| Other | VIP4-0444   | 2008 | China: Hong Kong         | Environmental | Fish      | VppAsia    | GCA_000500485.1  |
| Other | VIP4-0430   | 2008 | China: Hong Kong         | Environmental | Shellfish | VppAsia    | GCA_000500445.1  |
| Other | VIP4-0447   | 2008 | China: Hong Kong         | Environmental | Shellfish | VppAsia    | GCA_000500545.1  |
| Other | v110        | 2010 | China: Hong Kong         | Environmental | Shellfish | VppAsia    | GCA_000388025.1  |
| Other | M0605       | 2013 | Mexico: Sinaloa          | Environmental | Shellfish | VppX       | GCA_000523375.1  |
| Other | VP49        | 2008 | India: Mangalore         | Environmental | Others    | VppAsia    | GCA_000662375.1  |
| Other | K1275       | 2004 | USA: TX                  | Clinical      | NA        | VppAsia    | GCA_000958585.1  |
| Other | SG176       | 2006 | USA: GA                  | Environmental | NA        | VppAsia    | GCA_000958565.1  |
| Other | J-C2-34     | 1998 | USA: NC                  | Environmental | NA        | VppUS2     | GCA_000958655.1  |
| Other | 22702       | 1998 | USA: GA                  | Environmental | NA        | VppUS2     | GCA_000958645.1  |
| Other | CFSAN007437 | 2012 | USA: MD                  | Clinical      | Stool     | VppX       | GCA_000707165.2  |
| Other | CFSAN007438 | 2012 | USA: MD                  | Clinical      | Wound     | VppAsia    | GCA_000707145.2  |
| Other | CFSAN007439 | 2012 | USA: DE                  | Clinical      | Stool     | VppUS1     | GCA_000707025.2  |
| Other | CFSAN007446 | 2012 | USA: MD                  | Clinical      | Wound     | VppAsia    | GCA_000707685.2  |
| Other | CFSAN007447 | 2012 | USA: MD                  | Clinical      | Others    | VppAsia    | GCA_000707705.2  |
| Other | CFSAN007455 | 2013 | USA: MD                  | Clinical      | Stool     | VppX       | GCA_000706985.2  |
| Other | CFSAN007456 | 2010 | USA: MD                  | Environmental | Shellfish | VppAsia    | GCA_000707285.2  |
| Other | CFSAN012492 | 2010 | USA: MD                  | Environmental | Shellfish | VppAsia    | GCA_000707665.2  |
| Other | 13-028A2    | 2013 | Vietnam                  | Environmental | Shellfish | VppAsia    | GCA_000732245.1  |
| Other | NCKU_TN_S02 | 2008 | Thailand                 | Environmental | Sediment  | VppAsia    | GCA_000736345.1  |
| Other | FIM-S1392-  | 2014 | Mexico: Hermosillo       | Environmental | Sediment  | VppAsia    | GCA_000732995.1  |
| Other | MAVP-M      | 2011 | NA                       | Clinical      | NA        | VppAsia    | GCA_001023155.1  |
| Other | 04.2548     | 2004 | Canada: Ontario          | Clinical      | NA        | VppAsia    | GCA_000786855.1  |
| Other | 09.5357     | 2009 | Canada: New Brunswick    | Clinical      | NA        | VppAsia    | GCA_000786865.1  |
| Other | 09-3217     | 2009 | Canada: British Columbia | Clinical      | NA        | VppUS2     | GCA_000960655.1  |
| Other | GCSL_R5     | 2007 | USA: TX                  | Environmental | Shellfish | VppAsia    | GCA_001726165.1  |
| Other | GCSL_R10    | 2007 | USA: FL                  | Environmental | Shellfish | VppUS2     | GCA_001726175.1  |
| Other | GCSL_R42    | 2007 | USA: WA                  | Environmental | Shellfish | VppUS1     | GCA_001726485.1  |



| Type  | Strain ID         | Year | Location                 | Sample type   | Source    | Population | Accession Number |
|-------|-------------------|------|--------------------------|---------------|-----------|------------|------------------|
| Other | GCSL_R59          | 2007 | USA: ME                  | Environmental | Shellfish | VppUS1     | GCA_001726685.1  |
| Other | GCSL_R98          | 2007 | Canada: PEI              | Environmental | Shellfish | VppAsia    | GCA_001726965.1  |
| Other | CDC_K4764L        | 2006 | USA: VA                  | Clinical      | Stool     | VppAsia    | GCA_001727965.1  |
| Other | CDC_K5330         | 2007 | USA: TX                  | Clinical      | NA        | VppAsia    | GCA_001728375.1  |
| Other | CDC_K5620         | 2007 | USA: NY                  | Clinical      | Stool     | VppX       | GCA_001728665.1  |
| Other | CDC_K5701         | 2007 | USA: OR                  | Clinical      | Stool     | VppAsia    | GCA_001728755.1  |
| Other | FORC_014          | 2015 | SouthKorea: Pusan        | Environmental | NA        | VppAsia    | GCA_001636035.1  |
| Other | VH3               | 2007 | Greece                   | Environmental | Water     | VppAsia    | GCA_001013435.1  |
| Other | K23               | 2013 | India                    | Environmental | Others    | VppAsia    | GCA_001497485.1  |
| Other | RM-14-5           | 2014 | Canada                   | Environmental | Shellfish | VppUS1     | GCA_001273555.1  |
| Other | ISF-54-12         | 2011 | Canada                   | Environmental | Shellfish | VppUS2     | GCA_001280635.1  |
| Other | S357-21           | 2010 | Canada                   | Environmental | Shellfish | VppUS2     | GCA_001273635.1  |
| Other | S440-7            | 2012 | Canada                   | Environmental | Shellfish | VppUS1     | GCA_001270235.1  |
| Other | CFSAN018766       | 2004 | USA                      | Environmental | NA        | VppAsia    | GCA_001696215.1  |
| Other | CFSAN018767       | 2004 | USA                      | Environmental | NA        | VppUS2     | GCA_001696225.1  |
| Other | CFSAN025056       | 2009 | Peru                     | Clinical      | NA        | VppAsia    | GCA_001634185.1  |
| Other | A5Z1022           | 2005 | Canada: British Columbia | Clinical      | Stool     | VppAsia    | GCA_001608755.1  |
| Other | W501              | 2006 | Canada: British Columbia | Clinical      | Stool     | VppAsia    | GCA_001608855.1  |
| Other | A0EZ383           | 2000 | Canada: British Columbia | Clinical      | Stool     | VppAsia    | GCA_001609055.1  |
| Other | 06-043            | 2006 | Mozambique               | Environmental | NA        | VppAsia    | GCA_001856035.1  |
| Other | KVp10             | 2007 | Sweden                   | Environmental | NA        | VppUS2     | GCA_001707995.1  |
| Other | R10B2_71          | 1997 | USA: WA                  | Environmental | Shellfish | VppUS2     | GCA_001704915.1  |
| Other | GIMxtf381-2013.06 | 2013 | China: Haikou            | Environmental | Fish      | VppAsia    | GCA_001913785.1  |
| Other | OAG95             | 2007 | Spain                    | Environmental | NA        | VppX       | SRR5163851       |
| Other | G32               | 2012 | Spain: Galicia           | Clinical      | NA        | VppAsia    | SRR5163840       |
| Other | CFSAN045069_119   | 2015 | Spain: Galicia           | Clinical      | NA        | VppAsia    | SRR5163836       |
| Other | 14-1499-VP        | 2014 | UK                       | Environmental | Shellfish | VppUS2     | SRR5639914       |
| Other | 14-1498-F-VP      | 2014 | UK                       | Environmental | Shellfish | VppUS2     | SRR5639919       |
| Other | A1_2              | 2014 | China: Henan             | Environmental | Fish      | VppAsia    | NNRG00000000     |
| Other | A1_6              | 2014 | China: Henan             | Environmental | Fish      | VppAsia    | NNRD00000000     |
| Other | A1_7              | 2014 | China: Henan             | Environmental | Fish      | VppX       | NNRC00000000     |
| Other | A1_8              | 2014 | China: Henan             | Environmental | Fish      | VppX       | NNRB00000000     |
| Other | A1_9              | 2014 | China: Henan             | Environmental | Water     | VppAsia    | NNRA00000000     |
| Other | A2_1              | 2014 | China: Henan             | Environmental | Fish      | VppAsia    | NNQZ00000000     |
| Other | A2_2              | 2014 | China: Henan             | Environmental | Fish      | VppX       | NNQY00000000     |
| Other | A2_4              | 2014 | China: Henan             | Environmental | Fish      | VppAsia    | NNQW00000000     |
| Other | A2_5              | 2014 | China: Henan             | Environmental | Fish      | VppAsia    | NNQV00000000     |
| Other | A2_6              | 2014 | China: Henan             | Environmental | Fish      | VppAsia    | NNQU00000000     |
| Other | A2_7              | 2014 | China: Henan             | Environmental | Water     | VppAsia    | NNQT00000000     |
| Other | A2_8              | 2014 | China: Henan             | Environmental | Fish      | VppAsia    | NNQS00000000     |
| Other | A3_2              | 2014 | China: Henan             | Environmental | Fish      | VppAsia    | NNQQ00000000     |
| Other | A3_4              | 2014 | China: Henan             | Environmental | Fish      | VppAsia    | NNQO00000000     |
| Other | A3_5              | 2014 | China: Henan             | Environmental | Water     | VppX       | NNQN00000000     |
| Other | A3_7              | 2014 | China: Henan             | Environmental | Fish      | VppAsia    | NNQL00000000     |
| Other | A3_9              | 2014 | China: Henan             | Environmental | Fish      | VppAsia    | NNQJ00000000     |
| Other | A4_1              | 2014 | China: Henan             | Environmental | Fish      | VppAsia    | NNQI00000000     |
| Other | A4_4              | 2014 | China: Henan             | Environmental | Fish      | VppAsia    | NNQF00000000     |
| Other | A4_5              | 2014 | China: Henan             | Environmental | Fish      | VppAsia    | NNQE00000000     |
| Other | A4_6              | 2014 | China: Henan             | Environmental | Fish      | VppAsia    | NNQD00000000     |
| Other | A4_9              | 2014 | China: Henan             | Environmental | Water     | VppAsia    | NNQC00000000     |
| Other | A5_3              | 2014 | China: Henan             | Environmental | Water     | VppAsia    | NNQA00000000     |
| Other | A5_4              | 2014 | China: Henan             | Environmental | Fish      | VppAsia    | NNPZ00000000     |
| Other | A5_7              | 2014 | China: Henan             | Environmental | Fish      | VppAsia    | NNPY00000000     |
| Other | A5_8              | 2014 | China: Henan             | Environmental | Fish      | VppAsia    | NNPX00000000     |
| Other | B1_1              | 2014 | China: Hubei             | Environmental | Fish      | VppAsia    | NNPW00000000     |
| Other | B1_10             | 2014 | China: Hubei             | Environmental | Fish      | VppAsia    | NNPV00000000     |
| Other | B1_3              | 2014 | China: Hubei             | Environmental | Fish      | VppAsia    | NNPU00000000     |
| Other | B1_5              | 2014 | China: Hubei             | Environmental | Fish      | VppAsia    | NNPS00000000     |
| Other | B1_8              | 2014 | China: Hubei             | Environmental | Fish      | VppAsia    | NNPP00000000     |
| Other | B10_1             | 2014 | China: Hubei             | Environmental | Fish      | VppAsia    | NNPN00000000     |
| Other | B10_2             | 2014 | China: Hubei             | Environmental | Fish      | VppX       | NNPM00000000     |
| Other | B10_3             | 2014 | China: Hubei             | Environmental | Fish      | VppAsia    | NNPL00000000     |
| Other | B10_7             | 2014 | China: Hubei             | Environmental | Fish      | VppAsia    | NNPI00000000     |
| Other | B2_4              | 2014 | China: Hubei             | Environmental | Fish      | VppAsia    | NNPB00000000     |
| Other | B2_8              | 2014 | China: Hubei             | Environmental | Fish      | VppAsia    | NNOX00000000     |
| Other | B3_1              | 2014 | China: Hubei             | Environmental | Fish      | VppAsia    | NNOV00000000     |
| Other | B3_10             | 2014 | China: Hubei             | Environmental | Fish      | VppAsia    | NNOU00000000     |
| Other | B3_7              | 2014 | China: Hubei             | Environmental | Fish      | VppAsia    | NNOO00000000     |

| Type  | Strain ID | Year | Location        | Sample type   | Source | Population | Accession Number |
|-------|-----------|------|-----------------|---------------|--------|------------|------------------|
| Other | B3_8      | 2014 | China: Hubei    | Environmental | Fish   | VppAsia    | NNON00000000     |
| Other | B3_9      | 2014 | China: Hubei    | Environmental | Fish   | VppAsia    | NNOM00000000     |
| Other | B4_10     | 2014 | China: Hubei    | Environmental | Fish   | VppAsia    | NNOK00000000     |
| Other | B4_3      | 2014 | China: Hubei    | Environmental | Fish   | VppAsia    | NNOI00000000     |
| Other | B4_5      | 2014 | China: Hubei    | Environmental | Fish   | VppX       | NNOH00000000     |
| Other | B4_8      | 2014 | China: Hubei    | Environmental | Fish   | VppAsia    | NNOE00000000     |
| Other | B4_9      | 2014 | China: Hubei    | Environmental | Fish   | VppAsia    | NNOD00000000     |
| Other | B5_10     | 2014 | China: Hubei    | Environmental | Water  | VppAsia    | NNOB00000000     |
| Other | B5_2      | 2014 | China: Hubei    | Environmental | Fish   | VppAsia    | NNOA00000000     |
| Other | B6_1      | 2014 | China: Hubei    | Environmental | Water  | VppAsia    | NNNT00000000     |
| Other | B6_10     | 2014 | China: Hubei    | Environmental | Water  | VppAsia    | NNNS00000000     |
| Other | B6_2      | 2014 | China: Hubei    | Environmental | Water  | VppAsia    | NNNR00000000     |
| Other | B6_3      | 2014 | China: Hubei    | Environmental | Water  | VppAsia    | NNNQ00000000     |
| Other | B6_4      | 2014 | China: Hubei    | Environmental | Fish   | VppAsia    | NNNP00000000     |
| Other | B6_6      | 2014 | China: Hubei    | Environmental | Fish   | VppAsia    | NNNN00000000     |
| Other | B6_8      | 2014 | China: Hubei    | Environmental | Water  | VppAsia    | NNNL00000000     |
| Other | B6_9      | 2014 | China: Hubei    | Environmental | Fish   | VppAsia    | NNNK00000000     |
| Other | B7_2      | 2014 | China: Hubei    | Environmental | Fish   | VppAsia    | NNNJ00000000     |
| Other | B7_3      | 2014 | China: Hubei    | Environmental | Fish   | VppAsia    | NNNI00000000     |
| Other | B7_5      | 2014 | China: Hubei    | Environmental | Fish   | VppAsia    | NNNG00000000     |
| Other | B7_6      | 2014 | China: Hubei    | Environmental | Fish   | VppAsia    | NNNF00000000     |
| Other | B8_10     | 2014 | China: Hubei    | Environmental | Fish   | VppAsia    | NNNC00000000     |
| Other | B8_2      | 2014 | China: Hubei    | Environmental | Fish   | VppAsia    | NNNB00000000     |
| Other | B8_4      | 2014 | China: Hubei    | Environmental | Fish   | VppAsia    | NNMZ00000000     |
| Other | B8_7      | 2014 | China: Hubei    | Environmental | Fish   | VppAsia    | NNMW00000000     |
| Other | B8_9      | 2014 | China: Hubei    | Environmental | Fish   | VppAsia    | NNMU00000000     |
| Other | B9_1      | 2014 | China: Hubei    | Environmental | Water  | VppAsia    | NNMT00000000     |
| Other | B9_10     | 2014 | China: Hubei    | Environmental | Fish   | VppAsia    | NNMS00000000     |
| Other | B9_5      | 2014 | China: Hubei    | Environmental | Water  | VppAsia    | NNMO00000000     |
| Other | B9_6      | 2014 | China: Hubei    | Environmental | Fish   | VppAsia    | NNMN00000000     |
| Other | B9_7      | 2014 | China: Hubei    | Environmental | Water  | VppAsia    | NNMM00000000     |
| Other | B9_8      | 2014 | China: Hubei    | Environmental | Fish   | VppAsia    | NNML00000000     |
| Other | C1_2      | 2014 | China: Shandong | Environmental | Fish   | VppAsia    | NNMI00000000     |
| Other | C1_5      | 2014 | China: Shandong | Environmental | Fish   | VppAsia    | NNMF00000000     |
| Other | C1_6      | 2014 | China: Shandong | Environmental | Fish   | VppAsia    | NNME00000000     |
| Other | C1_8      | 2014 | China: Shandong | Environmental | Water  | VppAsia    | NNMC00000000     |
| Other | C1_9      | 2014 | China: Shandong | Environmental | Water  | VppAsia    | NNMB00000000     |
| Other | C10_5     | 2014 | China: Zhejiang | Environmental | Fish   | VppX       | NNLZ00000000     |
| Other | C2_5      | 2014 | China: Shandong | Environmental | Fish   | VppAsia    | NNLV00000000     |
| Other | C2_6      | 2014 | China: Shandong | Environmental | Fish   | VppAsia    | NNLU00000000     |
| Other | C2_8      | 2014 | China: Shandong | Environmental | Fish   | VppAsia    | NNLT00000000     |
| Other | C3_10     | 2014 | China: Shandong | Environmental | Water  | VppAsia    | NNLS00000000     |
| Other | C3_2      | 2014 | China: Shandong | Environmental | Fish   | VppAsia    | NNLR00000000     |
| Other | C3_3      | 2014 | China: Shandong | Environmental | Fish   | VppAsia    | NNLQ00000000     |
| Other | C3_4      | 2014 | China: Shandong | Environmental | Fish   | VppX       | NNLP00000000     |
| Other | C3_5      | 2014 | China: Shandong | Environmental | Fish   | VppX       | NNLO00000000     |
| Other | C4_3      | 2014 | China: Shandong | Environmental | Fish   | VppAsia    | NNLJ00000000     |
| Other | C4_4      | 2014 | China: Shandong | Environmental | Fish   | VppAsia    | NNLI00000000     |
| Other | C4_5      | 2014 | China: Shandong | Environmental | Fish   | VppAsia    | NNLH00000000     |
| Other | C4_6      | 2014 | China: Shandong | Environmental | Fish   | VppAsia    | NNLG00000000     |
| Other | C4_7      | 2014 | China: Shandong | Environmental | Fish   | VppAsia    | NNLF00000000     |
| Other | C4_8      | 2014 | China: Shandong | Environmental | Fish   | VppAsia    | NNLE00000000     |
| Other | C5_1      | 2014 | China: Shandong | Environmental | Fish   | VppAsia    | NNLC00000000     |
| Other | C5_10     | 2014 | China: Shandong | Environmental | Water  | VppAsia    | NNLB00000000     |
| Other | C5_2      | 2014 | China: Shandong | Environmental | Fish   | VppAsia    | NNLA00000000     |
| Other | C5_6      | 2014 | China: Shandong | Environmental | Fish   | VppX       | NNKW00000000     |
| Other | C5_8      | 2014 | China: Shandong | Environmental | Fish   | VppAsia    | NNKU00000000     |
| Other | C5_9      | 2014 | China: Shandong | Environmental | Fish   | VppAsia    | NNKT00000000     |
| Other | C6_1      | 2014 | China: Shandong | Environmental | Fish   | VppAsia    | NNKS00000000     |
| Other | C6_10     | 2014 | China: Shandong | Environmental | Fish   | VppAsia    | NNKR00000000     |
| Other | C6_2      | 2014 | China: Shandong | Environmental | Fish   | VppAsia    | NNKQ00000000     |
| Other | C6_4      | 2014 | China: Shandong | Environmental | Fish   | VppAsia    | NNKP00000000     |
| Other | C6_5      | 2014 | China: Shandong | Environmental | Fish   | VppAsia    | NNKO00000000     |
| Other | C6_9      | 2014 | China: Shandong | Environmental | Fish   | VppAsia    | NNKK00000000     |
| Other | C7_1      | 2014 | China: Shandong | Environmental | Water  | VppAsia    | NNKJ00000000     |
| Other | C7_10     | 2014 | China: Shandong | Environmental | Fish   | VppAsia    | NNKI00000000     |
| Other | C7_2      | 2014 | China: Shandong | Environmental | Water  | VppAsia    | NNKH00000000     |
| Other | C7_3      | 2014 | China: Shandong | Environmental | Water  | VppAsia    | NNKG00000000     |

| Type  | Strain ID | Year | Location        | Sample type   | Source    | Population | Accession Number |
|-------|-----------|------|-----------------|---------------|-----------|------------|------------------|
| Other | C7_4      | 2014 | China: Shandong | Environmental | Fish      | VppAsia    | NNKF00000000     |
| Other | C7_5      | 2014 | China: Shandong | Environmental | Fish      | VppAsia    | NNKE00000000     |
| Other | C7_6      | 2014 | China: Shandong | Environmental | Fish      | VppAsia    | NNKD00000000     |
| Other | C7_7      | 2014 | China: Shandong | Environmental | Fish      | VppAsia    | NNKC00000000     |
| Other | C7_9      | 2014 | China: Shandong | Environmental | Fish      | VppAsia    | NNKB00000000     |
| Other | C8_3      | 2014 | China: Shandong | Environmental | Fish      | VppAsia    | NNJZ00000000     |
| Other | C8_5      | 2014 | China: Shandong | Environmental | Water     | VppX       | NNJX00000000     |
| Other | D1_4      | 2014 | China: Sichuan  | Environmental | Fish      | VppAsia    | NNJR00000000     |
| Other | D1_8      | 2014 | China: Sichuan  | Environmental | Fish      | VppAsia    | NNJP00000000     |
| Other | D2_2      | 2014 | China: Sichuan  | Environmental | Fish      | VppAsia    | NNJO00000000     |
| Other | D2_4      | 2014 | China: Sichuan  | Environmental | Fish      | VppAsia    | NNJN00000000     |
| Other | D2_7      | 2014 | China: Sichuan  | Environmental | Fish      | VppAsia    | NNJM00000000     |
| Other | D2_8      | 2014 | China: Sichuan  | Environmental | Fish      | VppAsia    | NNJL00000000     |
| Other | D2_9      | 2014 | China: Sichuan  | Environmental | Fish      | VppAsia    | NNJK00000000     |
| Other | D3_2      | 2014 | China: Sichuan  | Environmental | Fish      | VppAsia    | NNJJ00000000     |
| Other | D3_5      | 2014 | China: Sichuan  | Environmental | Fish      | VppAsia    | NNJI00000000     |
| Other | D4_3      | 2014 | China: Sichuan  | Environmental | Fish      | VppAsia    | NNJF00000000     |
| Other | D4_5      | 2014 | China: Sichuan  | Environmental | Water     | VppAsia    | NNJD00000000     |
| Other | D4_6      | 2014 | China: Sichuan  | Environmental | Fish      | VppAsia    | NNJC00000000     |
| Other | D4_7      | 2014 | China: Sichuan  | Environmental | Water     | VppAsia    | NNJB00000000     |
| Other | D5_1      | 2014 | China: Sichuan  | Environmental | Fish      | VppAsia    | NNJA00000000     |
| Other | D5_3      | 2014 | China: Sichuan  | Environmental | Fish      | VppAsia    | NNIZ00000000     |
| Other | D5_4      | 2014 | China: Sichuan  | Environmental | Fish      | VppAsia    | NNIY00000000     |
| Other | D5_6      | 2014 | China: Sichuan  | Environmental | Fish      | VppAsia    | NNIX00000000     |
| Other | D5_7      | 2014 | China: Sichuan  | Environmental | Water     | VppAsia    | NNIW00000000     |
| Other | D6_2      | 2014 | China: Sichuan  | Environmental | Fish      | VppAsia    | NNIT00000000     |
| Other | D6_3      | 2014 | China: Sichuan  | Environmental | Water     | VppAsia    | NNIS00000000     |
| Other | D6_4      | 2014 | China: Sichuan  | Environmental | Water     | VppAsia    | NNIR00000000     |
| Other | D6_5      | 2014 | China: Sichuan  | Environmental | Fish      | VppAsia    | NNIQ00000000     |
| Other | D6_6      | 2014 | China: Sichuan  | Environmental | Water     | VppAsia    | NNIP00000000     |
| Other | D6_7      | 2014 | China: Sichuan  | Environmental | Fish      | VppAsia    | NNIO00000000     |
| Other | D6_8      | 2014 | China: Sichuan  | Environmental | Fish      | VppAsia    | NNIN00000000     |
| Other | D7_1      | 2014 | China: Sichuan  | Environmental | Fish      | VppAsia    | NNIM00000000     |
| Other | D7_2      | 2014 | China: Sichuan  | Environmental | Water     | VppAsia    | NNIL00000000     |
| Other | D7_3      | 2014 | China: Sichuan  | Environmental | Fish      | VppAsia    | NNIK00000000     |
| Other | D7_4      | 2014 | China: Sichuan  | Environmental | Water     | VppAsia    | NNIJ00000000     |
| Other | D7_6      | 2014 | China: Sichuan  | Environmental | Fish      | VppAsia    | NNII00000000     |
| Other | D7_7      | 2014 | China: Sichuan  | Environmental | Fish      | VppAsia    | NNIH00000000     |
| Other | D7_8      | 2014 | China: Sichuan  | Environmental | Fish      | VppAsia    | NNIG00000000     |
| Other | D8_3      | 2014 | China: Sichuan  | Environmental | Water     | VppAsia    | NNID00000000     |
| Other | D8_4      | 2014 | China: Sichuan  | Environmental | Water     | VppAsia    | NNIC00000000     |
| Other | D8_5      | 2014 | China: Sichuan  | Environmental | Fish      | VppAsia    | NNIB00000000     |
| Other | D8_7      | 2014 | China: Sichuan  | Environmental | Fish      | VppAsia    | NNHZ00000000     |
| Other | D8_8      | 2014 | China: Sichuan  | Environmental | Fish      | VppAsia    | NNHY00000000     |
| Other | D8_9      | 2014 | China: Sichuan  | Environmental | Fish      | VppX       | NNHX00000000     |
| Other | D9_2      | 2014 | China: Sichuan  | Environmental | Fish      | VppAsia    | NNHW00000000     |
| Other | D9_3      | 2014 | China: Sichuan  | Environmental | Fish      | VppAsia    | NNHV00000000     |
| Other | D9_6      | 2014 | China: Sichuan  | Environmental | Fish      | VppAsia    | NNHT00000000     |
| Other | E1_10     | 2014 | China: Zhejiang | Environmental | Fish      | VppAsia    | NNHS00000000     |
| Other | E1_5      | 2014 | China: Zhejiang | Environmental | Fish      | VppAsia    | NNHR00000000     |
| Other | E1_9      | 2014 | China: Zhejiang | Environmental | Fish      | VppX       | NNHQ00000000     |
| Other | E2_10     | 2014 | China: Zhejiang | Environmental | Fish      | VppAsia    | NNHN00000000     |
| Other | E2_2      | 2014 | China: Zhejiang | Environmental | Fish      | VppAsia    | NNHM00000000     |
| Other | E3_1      | 2014 | China: Zhejiang | Environmental | Water     | VppAsia    | NNHK00000000     |
| Other | E3_10     | 2014 | China: Zhejiang | Environmental | Fish      | VppAsia    | NNHJ00000000     |
| Other | E4_10     | 2014 | China: Zhejiang | Environmental | Fish      | VppAsia    | NNHH00000000     |
| Other | E4_3      | 2014 | China: Zhejiang | Environmental | Fish      | VppAsia    | NNHF00000000     |
| Other | E4_4      | 2014 | China: Zhejiang | Environmental | Fish      | VppAsia    | NNHE00000000     |
| Other | E4_9      | 2014 | China: Zhejiang | Environmental | Fish      | VppAsia    | NNHD00000000     |
| Other | E5_8      | 2014 | China: Zhejiang | Environmental | Fish      | VppAsia    | NNHC00000000     |
| Other | E6_4      | 2014 | China: Zhejiang | Environmental | Water     | VppAsia    | NNHB00000000     |
| Other | E7_10     | 2014 | China: Zhejiang | Environmental | Fish      | VppAsia    | NNHA00000000     |
| Other | E7_9      | 2014 | China: Zhejiang | Environmental | Fish      | VppAsia    | NNGZ00000000     |
| Other | E9_8      | 2014 | China: Zhejiang | Environmental | Shellfish | VppAsia    | NNGX00000000     |
| Other | F1_1      | 2014 | China: Guangxi  | Environmental | Fish      | VppAsia    | NNGW00000000     |
| Other | F1_10     | 2014 | China: Guangxi  | Environmental | Fish      | VppAsia    | NNGV00000000     |
| Other | F1_4      | 2014 | China: Guangxi  | Environmental | Fish      | VppAsia    | NNGS00000000     |
| Other | F1_6      | 2014 | China: Guangxi  | Environmental | Water     | VppAsia    | NNGQ00000000     |

| Type  | Strain ID | Year | Location       | Sample type   | Source   | Population | Accession Number |
|-------|-----------|------|----------------|---------------|----------|------------|------------------|
| Other | F10_1     | 2014 | China: Guangxi | Environmental | Fish     | VppAsia    | NNGM00000000     |
| Other | F10_10    | 2014 | China: Guangxi | Environmental | Fish     | VppAsia    | NNGL00000000     |
| Other | F10_2     | 2014 | China: Guangxi | Environmental | Fish     | VppAsia    | NNGK00000000     |
| Other | F10_4     | 2014 | China: Guangxi | Environmental | Fish     | VppAsia    | NNGI00000000     |
| Other | F10_5     | 2014 | China: Guangxi | Environmental | Fish     | VppAsia    | NNGH00000000     |
| Other | F10_7     | 2014 | China: Guangxi | Environmental | Fish     | VppAsia    | NNGF00000000     |
| Other | F10_8     | 2014 | China: Guangxi | Environmental | Fish     | VppAsia    | NNGE00000000     |
| Other | F4_10     | 2014 | China: Guangxi | Environmental | Sediment | VppAsia    | NNFH00000000     |
| Other | F4_2      | 2014 | China: Guangxi | Environmental | Fish     | VppAsia    | NNFG00000000     |
| Other | F4_3      | 2014 | China: Guangxi | Environmental | Fish     | VppAsia    | NNFF00000000     |
| Other | F4_4      | 2014 | China: Guangxi | Environmental | Fish     | VppX       | NNFE00000000     |
| Other | F4_5      | 2014 | China: Guangxi | Environmental | Fish     | VppX       | NNFD00000000     |
| Other | F4_8      | 2014 | China: Guangxi | Environmental | Water    | VppAsia    | NNFA00000000     |
| Other | F4_9      | 2014 | China: Guangxi | Environmental | Sediment | VppAsia    | NNEZ00000000     |
| Other | F5_1      | 2014 | China: Guangxi | Environmental | Sediment | VppAsia    | NNEY00000000     |
| Other | F5_3      | 2014 | China: Guangxi | Environmental | Fish     | VppAsia    | NNEW00000000     |
| Other | F5_4      | 2014 | China: Guangxi | Environmental | Fish     | VppAsia    | NNEV00000000     |
| Other | F5_5      | 2014 | China: Guangxi | Environmental | Fish     | VppAsia    | NNEU00000000     |
| Other | F5_6      | 2014 | China: Guangxi | Environmental | Fish     | VppAsia    | NNET00000000     |
| Other | F5_7      | 2014 | China: Guangxi | Environmental | Fish     | VppAsia    | NNES00000000     |
| Other | F5_8      | 2014 | China: Guangxi | Environmental | Water    | VppAsia    | NNER00000000     |
| Other | F5_9      | 2014 | China: Guangxi | Environmental | Fish     | VppAsia    | NNEQ00000000     |
| Other | F6_1      | 2014 | China: Guangxi | Environmental | Water    | VppAsia    | NNEP00000000     |
| Other | F6_4      | 2014 | China: Guangxi | Environmental | Sediment | VppAsia    | NNEM00000000     |
| Other | F6_5      | 2014 | China: Guangxi | Environmental | Fish     | VppAsia    | NNEL00000000     |
| Other | F6_6      | 2014 | China: Guangxi | Environmental | Fish     | VppAsia    | NNEK00000000     |
| Other | F6_7      | 2014 | China: Guangxi | Environmental | Fish     | VppAsia    | NNEJ00000000     |
| Other | F6_8      | 2014 | China: Guangxi | Environmental | Fish     | VppAsia    | NNEI00000000     |
| Other | F7_10     | 2014 | China: Guangxi | Environmental | Water    | VppAsia    | NNEG00000000     |
| Other | F7_3      | 2014 | China: Guangxi | Environmental | Water    | VppAsia    | NNEE00000000     |
| Other | F7_7      | 2014 | China: Guangxi | Environmental | Water    | VppAsia    | NNEB00000000     |
| Other | F7_8      | 2014 | China: Guangxi | Environmental | Fish     | VppAsia    | NNEA00000000     |
| Other | F7_9      | 2014 | China: Guangxi | Environmental | Water    | VppAsia    | NNDZ00000000     |
| Other | F8_1      | 2014 | China: Guangxi | Environmental | Water    | VppAsia    | NNDY00000000     |
| Other | F8_3      | 2014 | China: Guangxi | Environmental | Water    | VppX       | NNDV00000000     |
| Other | F8_5      | 2014 | China: Guangxi | Environmental | Fish     | VppAsia    | NNDT00000000     |
| Other | F8_6      | 2014 | China: Guangxi | Environmental | Fish     | VppAsia    | NNDS00000000     |
| Other | F8_7      | 2014 | China: Guangxi | Environmental | Fish     | VppAsia    | NNDR00000000     |
| Other | F8_8      | 2014 | China: Guangxi | Environmental | Fish     | VppAsia    | NNDQ00000000     |
| Other | F8_9      | 2014 | China: Guangxi | Environmental | Fish     | VppAsia    | NNDP00000000     |
| Other | F9_1      | 2014 | China: Guangxi | Environmental | Fish     | VppAsia    | NNDO00000000     |
| Other | F9_10     | 2014 | China: Guangxi | Environmental | Fish     | VppAsia    | NNDN00000000     |
| Other | F9_2      | 2014 | China: Guangxi | Environmental | Fish     | VppAsia    | NNDM00000000     |
| Other | F9_3      | 2014 | China: Guangxi | Environmental | Fish     | VppAsia    | NNDL00000000     |
| Other | F9_5      | 2014 | China: Guangxi | Environmental | Fish     | VppAsia    | NNDJ00000000     |
| Other | F9_6      | 2014 | China: Guangxi | Environmental | Fish     | VppAsia    | NNDI00000000     |
| Other | F9_7      | 2014 | China: Guangxi | Environmental | Fish     | VppAsia    | NNDH00000000     |
| Other | F9_8      | 2014 | China: Guangxi | Environmental | Fish     | VppAsia    | NNDG00000000     |
| Other | F9_9      | 2014 | China: Guangxi | Environmental | Fish     | VppAsia    | NNDF00000000     |
| Other | G1_2      | 2014 | China: Guangxi | Environmental | Fish     | VppAsia    | NNDC00000000     |
| Other | G2_3      | 2014 | China: Guangxi | Environmental | Fish     | VppAsia    | NNCS00000000     |
| Other | G2_5      | 2014 | China: Guangxi | Environmental | Fish     | VppAsia    | NNCR00000000     |
| Other | G2_6      | 2014 | China: Guangxi | Environmental | Water    | VppAsia    | NNCQ00000000     |
| Other | S010      | NA   | NA             | NA            | NA       | VppAsia    | NNCO00000000     |
| Other | S107      | NA   | NA             | NA            | NA       | VppAsia    | NNCL00000000     |
| Other | S149      | NA   | NA             | NA            | NA       | VppAsia    | NNCK00000000     |
| Other | S178      | NA   | NA             | NA            | NA       | VppAsia    | NNCG00000000     |

**Supplementary Table 4 The PCR primers used to identify *V. parahaemolyticus* strain**

| Primer         | Sequence (3' to 5')            | Target gene | Annealing temperature (°C) | Cycling number | Amplicon (bp) | Reference |
|----------------|--------------------------------|-------------|----------------------------|----------------|---------------|-----------|
| <i>toxR</i> -F | TGTACTGTTGAACGCCTAA            | <i>toxR</i> | 55                         | 30             | 503           | (1)       |
| <i>toxR</i> -R | CACGTTCTCATACGAGTG             |             |                            |                |               |           |
| <i>tdh</i> -F  | GTAAAGGTCTCTGACTTTTGGAC        | <i>tdh</i>  | 60                         | 30             | 270           | (2)       |
| <i>tdh</i> -R  | TGGAATAGAACCTTCATCTCACC        |             |                            |                |               |           |
| <i>trh</i> -F  | TTGGCTTCGATATTTTCAGTATCT       | <i>trh</i>  | 60                         | 30             | 500           | (2)       |
| <i>trh</i> -R  | AACAAACATATGCCCATTTCCG         |             |                            |                |               |           |
| <i>tlh</i> -R  | AAAGCGGATTATGCAGAAGCACTG       | <i>tlh</i>  | 60                         | 30             | 450           | (2)       |
| <i>tlh</i> -F  | GCTACTTTCTAGCATTTTCTCTGC       |             |                            |                |               |           |
| <i>Int1</i> -F | TCATGGCTTGTTATGACTGT           | Int1        | 52                         | 30             | 403           | (3, 4)    |
| <i>Int1</i> -R | GTAGGGCTTATTATGCACGC           |             |                            |                |               |           |
| <i>Int2</i> -F | GATGCCATCGCAAGTACGAG           | Int2        | 52                         | 30             | 717           | (3, 4)    |
| <i>Int2</i> -R | CGGGATCCCGGACGGCATGCACGATTTGTA |             |                            |                |               |           |

## References

1. Park JY, Jeon S, Kim JY, Park M, Kin S. 2013. Multiplex Real-time Polymerase Chain Reaction Assays for Simultaneous Detection of *Vibrio cholerae*, *Vibrio parahaemolyticus*, and *Vibrio vulnificus*. *Osong public health and research perspectives* 4: 133-139.
2. Bej AK, Patterson DP, Brasher CW, Vickey MC, Jones DD, Kaysner CA. 1999. Detection of total and hemolysin-producing *Vibrio parahaemolyticus* in shellfish using multiplex PCR amplification of *tl*, *tdh* and *trh*. *Journal microbiological methods* 36: 215-225.
3. Su J, Shi L, Yang L, Xiao Z, Li X, Yamasaki S. 2006. Analysis of integrons in clinical isolates of *Escherichia coli* in China during the last six years. *FEMS microbiology letters* 254: 75-80.
4. Blahna MT, Zalewski CA, Reuer J, Kahlmeter G, Foxman B, Marrs CF. 2006. The role of horizontal gene transfer in the spread of trimethoprim-sulfamethoxazole resistance among uropathogenic *Escherichia coli* in Europe and Canada. *Journal of antimicrobial chemotherapy* 57: 666-672.

Supplementary Table 5 The information of the sequences similar to plasmid pCol3M

| Description                                                                                                                                                                              | Scientific Name                                                | Max Score | Total Score | Query Cover | E value | Per. Ident | Acc. Len | Accession  |
|------------------------------------------------------------------------------------------------------------------------------------------------------------------------------------------|----------------------------------------------------------------|-----------|-------------|-------------|---------|------------|----------|------------|
| Proteus mirabilis plasmid pM510, complete sequence                                                                                                                                       | <i>Proteus mirabilis</i>                                       | 4865      | 5191        | 100%        | 0       | 100.00%    | 2683     | KJ190020.1 |
| Proteus mirabilis plasmid pRS12-11, complete sequence                                                                                                                                    | <i>Proteus mirabilis</i>                                       | 4841      | 5191        | 100%        | 0       | 100.00%    | 2683     | KF364953.1 |
| Proteus vulgaris strain Q5169 plasmid pEAD1-1, complete sequence                                                                                                                         | <i>Proteus vulgaris</i>                                        | 4619      | 5191        | 100%        | 0       | 100.00%    | 2683     | KF498970.1 |
| Proteus mirabilis strain 1035 plasmid pPM1035, complete sequence                                                                                                                         | <i>Proteus mirabilis</i>                                       | 4619      | 5191        | 100%        | 0       | 100.00%    | 2683     | CP072780.1 |
| Proteus mirabilis strain 1035 plasmid pPM1035, complete sequence                                                                                                                         | <i>Proteus mirabilis</i>                                       | 4619      | 5191        | 100%        | 0       | 100.00%    | 2683     | MW248467.1 |
| Proteus mirabilis strain SCSZC10 plasmid pSCSZC10-qnrD1, complete sequence                                                                                                               | <i>Proteus mirabilis</i>                                       | 4547      | 5191        | 100%        | 0       | 100.00%    | 2683     | MT349898.1 |
| Proteus mirabilis strain SCRNC2 plasmid pSCRNC2-qnrD1, complete sequence                                                                                                                 | <i>Proteus mirabilis</i>                                       | 4547      | 5191        | 100%        | 0       | 100.00%    | 2683     | MT349897.1 |
| Proteus mirabilis strain HERJC5 plasmid pHERJC5-qnrD1, complete sequence                                                                                                                 | <i>Proteus mirabilis</i>                                       | 4547      | 5191        | 100%        | 0       | 100.00%    | 2683     | MT349895.1 |
| Proteus mirabilis strain HBSZC6 plasmid pHBSZC6-qnrD1, complete sequence                                                                                                                 | <i>Proteus mirabilis</i>                                       | 4547      | 5191        | 100%        | 0       | 100.00%    | 2683     | MT349892.1 |
| Proteus mirabilis strain HBSZC3 plasmid pHBSZC3-qnrD1, complete sequence                                                                                                                 | <i>Proteus mirabilis</i>                                       | 4547      | 5191        | 100%        | 0       | 100.00%    | 2683     | MT349891.1 |
| Proteus mirabilis strain HBDW1 plasmid pHBDW1-qnrD1, complete sequence                                                                                                                   | <i>Proteus mirabilis</i>                                       | 4547      | 5191        | 100%        | 0       | 100.00%    | 2683     | MT349890.1 |
| Providencia stuartii strain MF1 plasmid pMF1A, complete sequence                                                                                                                         | <i>Providencia stuartii</i>                                    | 4418      | 5191        | 100%        | 0       | 100.00%    | 2683     | CP048622.1 |
| Proteus sp. ZN5 plasmid pZN5-qnrD, complete sequence                                                                                                                                     | <i>Proteus sp. ZN5</i>                                         | 4161      | 5191        | 100%        | 0       | 100.00%    | 2683     | CP047641.1 |
| Proteus terrae subsp. cibarius strain ZF2 plasmid pZF2-qnrD, complete sequence                                                                                                           | <i>Proteus terrae subsp. cibarius</i>                          | 4037      | 5191        | 100%        | 0       | 100.00%    | 2683     | CP045011.1 |
| Proteus mirabilis strain ZA25 plasmid pZA25-qnrD, complete sequence                                                                                                                      | <i>Proteus mirabilis</i>                                       | 3989      | 5191        | 100%        | 0       | 100.00%    | 2683     | CP047354.1 |
| Proteus terrae subsp. cibarius strain ZF1 plasmid pZF1-qnrD, complete sequence                                                                                                           | <i>Proteus terrae subsp. cibarius</i>                          | 3729      | 5191        | 100%        | 0       | 100.00%    | 2683     | CP047343.1 |
| Salmonella enterica subsp. enterica serovar Heidelberg strain 69 plasmid, partial sequence                                                                                               | <i>Salmonella enterica subsp. enterica serovar Heidelberg</i>  | 3441      | 5191        | 100%        | 0       | 100.00%    | 2683     | MK191843.1 |
| Morganella morganii strain MP63 plasmid pMP63B, complete sequence                                                                                                                        | <i>Morganella morganii</i>                                     | 3411      | 5191        | 100%        | 0       | 100.00%    | 2683     | CP048808.1 |
| Proteus sp. NMG38-2 plasmid p2_NMG38-2, complete sequence                                                                                                                                | <i>Proteus sp. NMG38-2</i>                                     | 3182      | 5191        | 100%        | 0       | 100.00%    | 2683     | CP085484.1 |
| Proteus mirabilis strain HBRJC9 plasmid pHBRJC9-qnrD1, complete sequence                                                                                                                 | <i>Proteus mirabilis</i>                                       | 3040      | 5762        | 100%        | 0       | 100.00%    | 4538     | MT349901.1 |
| Proteus vulgaris plasmid pRS12-78, complete sequence                                                                                                                                     | <i>Proteus vulgaris</i>                                        | 3040      | 5229        | 100%        | 0       | 100.00%    | 4286     | KF364954.1 |
| Salmonella enterica subsp. enterica serovar Braenderup strain 95.50 plasmid KVHS-001 transposase (insB) and plasmid mediated quinolone resistance protein (qnrD1) genes, complete cds    | <i>Salmonella enterica subsp. enterica serovar Braenderup</i>  | 2939      | 5207        | 100%        | 0       | 100.00%    | 6887     | KJ685894.1 |
| Salmonella enterica subsp. enterica serovar Typhimurium strain 14620 plasmid KVHS-002 transposase (insB) and plasmid mediated quinolone resistance protein (qnrD1) genes, complete cds   | <i>Salmonella enterica subsp. enterica serovar Typhimurium</i> | 2939      | 5207        | 100%        | 0       | 100.00%    | 8127     | KJ685893.1 |
| Salmonella enterica subsp. enterica serovar Montevideo strain 29722/48 plasmid KVHS-003 transposase (insB) and plasmid mediated quinolone resistance protein (qnrD1) genes, complete cds | <i>Salmonella enterica subsp. enterica serovar Montevideo</i>  | 2939      | 5207        | 100%        | 0       | 100.00%    | 9384     | KJ685891.1 |
| Proteus mirabilis strain CGP248 plasmid pCGP248, complete sequence                                                                                                                       | <i>Proteus mirabilis</i>                                       | 2915      | 5191        | 100%        | 0       | 100.00%    | 2683     | QJ776503.1 |
| Morganella morganii strain Vr831 plasmid p831 pentapeptide repeat protein (qnrD) and hypothetical protein genes, complete cds                                                            | <i>Morganella morganii</i>                                     | 2915      | 5163        | 100%        | 0       | 100.00%    | 2684     | JN183061.1 |
| Proteus mirabilis strain T80 plasmid pT80 pentapeptide repeat protein (qnrD) and hypothetical protein genes, complete cds                                                                | <i>Proteus mirabilis</i>                                       | 2915      | 5167        | 100%        | 0       | 100.00%    | 2687     | JN183060.1 |
| Proteus terrae subsp. cibarius strain ZN2 plasmid pZN2-qnrD, complete sequence                                                                                                           | <i>Proteus terrae subsp. cibarius</i>                          | 2876      | 5191        | 100%        | 0       | 100.00%    | 2683     | CP047351.1 |
| Proteus mirabilis strain PmZXF plasmid pPmZXF, complete sequence                                                                                                                         | <i>Proteus mirabilis</i>                                       | 2846      | 5185        | 100%        | 0       | 100.00%    | 2683     | KP313759.1 |
| Proteus mirabilis strain PmBR607 plasmid unnamed2, complete sequence                                                                                                                     | <i>Proteus mirabilis</i>                                       | 2769      | 5191        | 100%        | 0       | 100.00%    | 2683     | CP049755.1 |
| Proteus terrae subsp. cibarius strain SDQ8C180-2T plasmid pSDQ8C180-2, complete sequence                                                                                                 | <i>Proteus terrae subsp. cibarius</i>                          | 2567      | 5569        | 100%        | 0       | 100.00%    | 5202     | CP073358.1 |
| Proteus mirabilis strain CRE141B plasmid pIB_COL3M, complete sequence                                                                                                                    | <i>Proteus mirabilis</i>                                       | 2819      | 5139        | 99%         | 0       | 100.00%    | 2655     | CP045539.1 |
| Moellerella wisconsensis strain W51 plasmid pW51-c, complete sequence                                                                                                                    | <i>Moellerella wisconsensis</i>                                | 3515      | 5082        | 97%         | 0       | 100.00%    | 2624     | CP093248.1 |
| Providencia alcalifaciens strain BT169 plasmid pBT169, complete sequence                                                                                                                 | <i>Providencia alcalifaciens</i>                               | 4835      | 5185        | 100%        | 0       | 99.96%     | 2683     | MH085194.1 |
| Proteus mirabilis plasmid pRS12-104, complete sequence                                                                                                                                   | <i>Proteus mirabilis</i>                                       | 4835      | 5185        | 100%        | 0       | 99.96%     | 2683     | KF364955.1 |
| Providencia rettgeri strain YPR25 plasmid pYPR25-3, complete sequence                                                                                                                    | <i>Providencia rettgeri</i>                                    | 4835      | 5185        | 100%        | 0       | 99.96%     | 2683     | CP060729.1 |
| Proteus mirabilis strain C1042 plasmid p1042, complete sequence                                                                                                                          | <i>Proteus mirabilis</i>                                       | 4833      | 5183        | 100%        | 0       | 99.96%     | 2682     | KP330456.1 |
| Proteus mirabilis strain 39224 plasmid p39224, complete sequence                                                                                                                         | <i>Proteus mirabilis</i>                                       | 4614      | 5185        | 100%        | 0       | 99.96%     | 2683     | MF062094.1 |
| Proteus vulgaris strain 36852 plasmid p36852, complete sequence                                                                                                                          | <i>Proteus vulgaris</i>                                        | 4614      | 5185        | 100%        | 0       | 99.96%     | 2683     | MF062093.1 |
| Proteus mirabilis strain SCSZC22 plasmid pSCSZC22-qnrD1, complete sequence                                                                                                               | <i>Proteus mirabilis</i>                                       | 4542      | 5185        | 100%        | 0       | 99.96%     | 2683     | MT349899.1 |
| Citrobacter freundii strain RHB14-C12 plasmid pRHB14-C12_2, complete sequence                                                                                                            | <i>Citrobacter freundii</i>                                    | 4137      | 5185        | 100%        | 0       | 99.96%     | 2683     | CP057825.1 |
| Proteus mirabilis plasmid pRS12-189, complete sequence                                                                                                                                   | <i>Proteus mirabilis</i>                                       | 4785      | 5135        | 99%         | 0       | 99.96%     | 2656     | KF364956.1 |
| Moellerella wisconsensis strain W17-3 plasmid pW17-3-b, complete sequence                                                                                                                | <i>Moellerella wisconsensis</i>                                | 3530      | 5185        | 100%        | 0       | 99.95%     | 2683     | CP093262.1 |
| Morganella morganii plasmid pM60, complete sequence                                                                                                                                      | <i>Morganella morganii</i>                                     | 3343      | 5185        | 100%        | 0       | 99.94%     | 2683     | KF813021.1 |
| Salmonella enterica subsp. enterica serovar Hadar strain 139.67 plasmid KVHS-004 plasmid mediated quinolone resistance protein (qnrD1) and regulator protein (rop) genes, complete cds   | <i>Salmonella enterica subsp. enterica serovar Hadar</i>       | 2955      | 5198        | 100%        | 0       | 99.94%     | 6227     | KJ685892.1 |
| Proteus vulgaris strain MB18 plasmid pMB18, complete sequence                                                                                                                            | <i>Proteus vulgaris</i>                                        | 2907      | 5617        | 100%        | 0       | 99.94%     | 5201     | KM577619.1 |
| Providencia rettgeri strain AB213 plasmid pAB213, complete sequence                                                                                                                      | <i>Providencia rettgeri</i>                                    | 4830      | 5180        | 100%        | 0       | 99.92%     | 2683     | MH085193.1 |
| Proteus mirabilis strain HBNNC22 plasmid pHBNNC22-qnrD1, complete sequence                                                                                                               | <i>Proteus mirabilis</i>                                       | 4536      | 5180        | 100%        | 0       | 99.92%     | 2683     | MT349896.1 |
| Proteus vulgaris strain ZN3 plasmid pZN3-qnrD, complete sequence                                                                                                                         | <i>Proteus vulgaris</i>                                        | 3615      | 5180        | 100%        | 0       | 99.90%     | 2683     | CP047348.1 |
| Providencia rettgeri plasmid pDIJ09-518a, complete sequence                                                                                                                              | <i>Providencia rettgeri</i>                                    | 4824      | 5174        | 100%        | 0       | 99.89%     | 2683     | HQ834472.1 |
| Proteus mirabilis strain HBSZC23 plasmid pHBSZC23-qnrD1, complete sequence                                                                                                               | <i>Proteus mirabilis</i>                                       | 4530      | 5174        | 100%        | 0       | 99.88%     | 2683     | MT349893.1 |
| Proteus sp. 3M plasmid p3M-2B, complete sequence                                                                                                                                         | <i>Proteus sp. 3M</i>                                          | 3044      | 6011        | 100%        | 0       | 99.88%     | 5903     | JX514066.1 |
| Providencia rettgeri plasmid pGHS09-09a, complete sequence                                                                                                                               | <i>Providencia rettgeri</i>                                    | 4813      | 5163        | 100%        | 0       | 99.81%     | 2683     | HQ834473.1 |
| Ochrobactrum anthropi plasmid pOA8912 complete sequence                                                                                                                                  | <i>Brucella anthropi</i>                                       | 2898      | 5152        | 100%        | 0       | 99.81%     | 2683     | HF679278.1 |
| Morganella morganii strain CGH69 plasmid pCGH69, complete sequence                                                                                                                       | <i>Morganella morganii</i>                                     | 2898      | 5152        | 100%        | 0       | 99.81%     | 2683     | JQ776510.1 |
| Proteus mirabilis strain HBSZC25 plasmid pHBSZC25-qnrD1, complete sequence                                                                                                               | <i>Proteus mirabilis</i>                                       | 4519      | 5152        | 100%        | 0       | 99.80%     | 2683     | MT349894.1 |
| Proteus mirabilis strain HBDJC1 plasmid pHBDJC1-qnrD1, complete sequence                                                                                                                 | <i>Proteus mirabilis</i>                                       | 4514      | 5147        | 100%        | 0       | 99.76%     | 2683     | MT349889.1 |
| Proteus penneri strain 22499 plasmid p22499, complete sequence                                                                                                                           | <i>Proteus penneri</i>                                         | 4547      | 5119        | 100%        | 0       | 99.48%     | 2683     | MF062092.1 |
| Proteus mirabilis strain RGF134-1 plasmid pRGF134-1-5kb, complete sequence                                                                                                               | <i>Proteus mirabilis</i>                                       | 5107      | 8439        | 100%        | 0       | 99.47%     | 5947     | CP066835.1 |
| Proteus mirabilis strain Q1084 plasmid pEAD1-2, complete sequence                                                                                                                        | <i>Proteus mirabilis</i>                                       | 4266      | 4790        | 99%         | 0       | 97.70%     | 2669     | KF498971.1 |
| Proteus mirabilis strain 39190 plasmid p39190, complete sequence                                                                                                                         | <i>Proteus mirabilis</i>                                       | 4255      | 4796        | 99%         | 0       | 97.62%     | 2669     | MF062091.1 |
| Serratia marcescens Sm3 plasmid pSm3qnr DNA, complete sequence                                                                                                                           | <i>Serratia marcescens</i>                                     | 2708      | 5174        | 100%        | 0       | 97.60%     | 5204     | LC543863.1 |
| Proteus mirabilis strain 36854 plasmid p36854, complete sequence                                                                                                                         | <i>Proteus mirabilis</i>                                       | 4028      | 4513        | 99%         | 0       | 95.98%     | 2669     | MF062090.1 |
| Proteus mirabilis strain 33184 plasmid p33184, complete sequence                                                                                                                         | <i>Proteus mirabilis</i>                                       | 3984      | 4491        | 99%         | 0       | 95.74%     | 2657     | MF062089.1 |
| Proteus mirabilis plasmid pLRB12-304, complete sequence                                                                                                                                  | <i>Proteus mirabilis</i>                                       | 4191      | 4508        | 100%        | 0       | 95.69%     | 2658     | KF364957.1 |
| Morganella morganii strain SE10MM plasmid pSE10MM, complete sequence                                                                                                                     | <i>Morganella morganii</i>                                     | 4098      | 4373        | 100%        | 0       | 94.79%     | 2662     | KU160530.1 |

Supplementary Table 6 The genome sequence quality data of 124 *V. parahaemolyticus* strains in this study

| Isolate name | AvgQuality | N50     | NrContigs | length of assembled genome | NrConsensus | GC%  |
|--------------|------------|---------|-----------|----------------------------|-------------|------|
| SH2-1        | 29746.1    | 451185  | 183       | 5443542                    | 2252        | 45.1 |
| SH2-2        | 80775.7    | 379247  | 65        | 5250422                    | 2252        | 45.3 |
| SH4-3        | 29037.7    | 484917  | 189       | 5488132                    | 2252        | 45   |
| SH5-1        | 72196.1    | 833232  | 69        | 4981528                    | 2253        | 45.4 |
| SH7-1        | 76031.1    | 752950  | 66        | 5018050                    | 2258        | 45.4 |
| SH7-2        | 27484.0    | 542492  | 200       | 5496810                    | 2262        | 44.6 |
| SH8-1        | 59322.7    | 389147  | 100       | 5932271                    | 2258        | 44.1 |
| SH8-2        | 84711.3    | 520564  | 69        | 5845083                    | 2253        | 44.1 |
| SH10-3       | 21898.6    | 321425  | 241       | 5277558                    | 2266        | 45.1 |
| SH10-4       | 60561.3    | 550459  | 83        | 5026585                    | 2250        | 45.3 |
| SH11-1       | 63357.8    | 386680  | 78        | 4941907                    | 2252        | 45.4 |
| SH13-1       | 16315.8    | 559111  | 343       | 5596333                    | 2257        | 45.0 |
| SH14-1       | 80817.7    | 555389  | 62        | 5010699                    | 2260        | 45.4 |
| SH14-2       | 47187.8    | 494874  | 106       | 5001905                    | 2257        | 45.4 |
| SH15-1       | 81248.6    | 545398  | 64        | 5199912                    | 2251        | 45.2 |
| SH15-2       | 66706.4    | 402301  | 78        | 5203096                    | 2258        | 45.3 |
| SH16-1       | 83781.8    | 404865  | 63        | 5278254                    | 2252        | 45.2 |
| SH16-2       | 75635.4    | 478301  | 70        | 5294478                    | 2252        | 45.2 |
| FT2-1        | 71957.2    | 891607  | 71        | 5108963                    | 2253        | 45.3 |
| FT2-2        | 91308.8    | 572348  | 54        | 4930677                    | 2254        | 45.4 |
| FT3-1        | 43356.3    | 1018916 | 116       | 5029332                    | 2254        | 45.3 |
| FT3-2        | 23093.5    | 612059  | 246       | 5681001                    | 2255        | 44.6 |
| FT8-1        | 135742.4   | 747487  | 37        | 5022468                    | 2257        | 45.3 |
| FT8-2        | 81675.9    | 478234  | 61        | 4982229                    | 2256        | 45.3 |
| 1-1          | 90166.6    | 499153  | 55        | 4959165                    | 2254        | 45.4 |
| 1-2          | 41955.5    | 361812  | 125       | 5244434                    | 2250        | 45.2 |
| 2-1          | 65146.0    | 342903  | 78        | 5081385                    | 2250        | 45.3 |
| 3-1          | 64266.5    | 530109  | 78        | 5012784                    | 2260        | 45.4 |
| 3-2          | 94313.4    | 531584  | 53        | 4998611                    | 2249        | 45.4 |
| 4-1          | 71619.7    | 405914  | 71        | 5084998                    | 2258        | 45.4 |
| 4-2          | 71625.1    | 405914  | 71        | 5085385                    | 2258        | 45.4 |
| 5-1          | 90736.1    | 449153  | 55        | 4990488                    | 2267        | 45.4 |
| 5-2          | 84998.8    | 505921  | 59        | 5014932                    | 2260        | 45.3 |
| 6-1          | 42628.5    | 361812  | 123       | 5243304                    | 2250        | 45.2 |
| 6-2          | 97422.5    | 432637  | 51        | 4968550                    | 2265        | 45.4 |
| 7-1          | 88349.5    | 731224  | 57        | 5035924                    | 2253        | 45.4 |
| 7-2          | 91346.7    | 433068  | 55        | 5024068                    | 2259        | 45.4 |
| 8-1          | 68906.5    | 540610  | 75        | 5167984                    | 2259        | 45.2 |
| 8-2          | 81029.5    | 464786  | 62        | 5023828                    | 2253        | 45.4 |
| 9-1          | 70822.8    | 487291  | 71        | 5028417                    | 2256        | 45.4 |
| 9-2          | 72868.0    | 549649  | 69        | 5027890                    | 2256        | 45.4 |
| 10-1         | 80366.2    | 452560  | 62        | 4982707                    | 2258        | 45.4 |
| 10-2         | 83040.7    | 548082  | 60        | 4982441                    | 2258        | 45.4 |
| 11-1         | 84228.6    | 376134  | 60        | 5053718                    | 2252        | 45.3 |
| 11-2         | 42078.8    | 338577  | 122       | 5133619                    | 2256        | 45.4 |
| 12-1         | 91565.7    | 450431  | 54        | 4944549                    | 2257        | 45.4 |
| 13-1         | 42773.5    | 379904  | 120       | 5132819                    | 2256        | 45.4 |
| 13-2         | 39151.7    | 213796  | 128       | 5011422                    | 2249        | 45.3 |
| 14-1         | 42425.6    | 401172  | 121       | 5133502                    | 2256        | 45.4 |
| 14-2         | 49084.6    | 448655  | 103       | 5055710                    | 2262        | 45.3 |
| 15-1         | 58464.3    | 211237  | 89        | 5203323                    | 2254        | 45.1 |
| 15-2         | 62471.5    | 441049  | 82        | 5122666                    | 2251        | 45.3 |
| 16-1         | 54476.1    | 530116  | 93        | 5066274                    | 2261        | 45.3 |
| 16-2         | 64237.4    | 457884  | 78        | 5010519                    | 2259        | 45.4 |
| 17-1         | 81092.0    | 412630  | 63        | 5108798                    | 2257        | 45.2 |
| 18-1         | 53904.4    | 530116  | 94        | 5067009                    | 2261        | 45.3 |
| 18-2         | 56377.2    | 466729  | 89        | 5017575                    | 2257        | 45.3 |
| 20-1         | 73531.2    | 737378  | 67        | 4926591                    | 2245        | 45.5 |
| 20-2         | 71902.0    | 534844  | 70        | 5033137                    | 2253        | 45.4 |
| 21-1         | 72313.7    | 570723  | 69        | 4989643                    | 2252        | 45.4 |
| 21-2         | 68314.2    | 547693  | 74        | 5055249                    | 2252        | 45.4 |
| 23-1         | 58913.2    | 402551  | 85        | 5007625                    | 2254        | 45.4 |
| 23-2         | 70464.2    | 455331  | 71        | 5002957                    | 2258        | 45.4 |
| 24-1         | 61394.0    | 290897  | 83        | 5095701                    | 2253        | 45.3 |
| 24-2         | 92794.8    | 704315  | 55        | 5103712                    | 2255        | 45.3 |
| 25-1         | 54884.7    | 461148  | 91        | 4994511                    | 2251        | 45.3 |
| 25-2         | 72507.5    | 461957  | 70        | 5075527                    | 2262        | 45.3 |
| 26-1         | 55681.7    | 530116  | 91        | 5067031                    | 2261        | 45.3 |
| 26-2         | 72137.7    | 317443  | 74        | 5338187                    | 2228        | 45.2 |
| 27-1         | 63550.0    | 289275  | 82        | 5211101                    | 2249        | 45.2 |
| 27-2         | 73062.0    | 466851  | 69        | 5041276                    | 2252        | 45.3 |
| 28-1         | 86711.8    | 358370  | 58        | 5029283                    | 2232        | 45.3 |
| 28-2         | 117236.3   | 734965  | 42        | 4923926                    | 2254        | 45.4 |
| 29-1         | 116066.9   | 452091  | 43        | 4990876                    | 2252        | 45.3 |
| 29-2         | 39225.7    | 232056  | 131       | 5138570                    | 2254        | 45.3 |
| 31-1         | 97513.6    | 789525  | 51        | 4973194                    | 2260        | 45.4 |
| 31-2         | 100462.1   | 460052  | 49        | 4922641                    | 2251        | 45.5 |
| 32-1         | 85201.6    | 784511  | 59        | 5026895                    | 2260        | 45.4 |
| 32-2         | 89763.5    | 784511  | 56        | 5026756                    | 2260        | 45.4 |
| 33-1         | 83151.6    | 262526  | 65        | 5404853                    | 2227        | 45.1 |

| Isolate name | AvgQuality | N50    | NrContigs | length of assembled genome | NrConsensus | GC%  |
|--------------|------------|--------|-----------|----------------------------|-------------|------|
| 33-2         | 90066.3    | 308794 | 60        | 5403979                    | 2227        | 45.1 |
| 34-1         | 69490.5    | 442412 | 72        | 5003319                    | 2258        | 45.4 |
| 34-2         | 86457.6    | 541740 | 58        | 5014542                    | 2261        | 45.4 |
| 35-1         | 85357.3    | 537969 | 59        | 5036079                    | 2250        | 45.4 |
| 35-2         | 88347.0    | 537969 | 57        | 5035779                    | 2250        | 45.4 |
| 36-1         | 66247.4    | 455156 | 77        | 5101047                    | 2259        | 45.3 |
| 36-2         | 54710.9    | 515695 | 92        | 5033407                    | 2256        | 45.4 |
| 37-1         | 71428.4    | 451741 | 70        | 4999987                    | 2262        | 45.3 |
| 37-2         | 75001.8    | 455156 | 68        | 5100123                    | 2259        | 45.3 |
| 38-1         | 68738.5    | 373166 | 74        | 5086646                    | 2266        | 45.3 |
| 38-2         | 62364.2    | 375609 | 81        | 5051499                    | 2254        | 45.3 |
| 39-1         | 33443.1    | 383508 | 153       | 5116787                    | 2253        | 45.2 |
| 40-1         | 31802.2    | 381501 | 162       | 5151953                    | 2259        | 45.2 |
| 40-2         | 68940.8    | 455156 | 74        | 5101620                    | 2259        | 45.3 |
| 41-1         | 54119.8    | 515695 | 93        | 5033137                    | 2256        | 45.4 |
| 41-2         | 68026.4    | 455156 | 75        | 5101978                    | 2259        | 45.3 |
| 42-1         | 47556.0    | 262928 | 112       | 5326277                    | 2247        | 45.1 |
| 42-2         | 47657.2    | 393098 | 105       | 5004008                    | 2247        | 45.4 |
| WS1-1        | 59158.6    | 731324 | 85        | 5028478                    | 2247        | 45.3 |
| F7-1         | 81988.3    | 459632 | 64        | 5247250                    | 2252        | 45.2 |
| F7-2         | 48535.1    | 346756 | 104       | 5047646                    | 2251        | 45.2 |
| F14-1        | 65529.7    | 338919 | 83        | 5438963                    | 2225        | 45.1 |
| F14-2        | 66327.5    | 338919 | 82        | 5438856                    | 2225        | 45.1 |
| WF2-1        | 64915.1    | 401724 | 78        | 5063381                    | 2265        | 45.3 |
| WF2-2        | 84673.0    | 340003 | 63        | 5334397                    | 2251        | 45.2 |
| Z8-1         | 58736.0    | 521491 | 86        | 5051300                    | 2260        | 45.4 |
| Z11-1        | 81887.2    | 524767 | 60        | 4913234                    | 2254        | 45.4 |
| Z11-2        | 75662.4    | 460977 | 68        | 5145040                    | 2251        | 45.3 |
| Z13-1        | 65060.7    | 378283 | 80        | 5204859                    | 2265        | 45.2 |
| Z13-2        | 65894.3    | 367553 | 79        | 5205647                    | 2265        | 45.2 |
| Z14-1        | 28014.5    | 91656  | 192       | 5378788                    | 2230        | 45.2 |
| Z14-2        | 65891.3    | 378283 | 79        | 5205413                    | 2265        | 45.2 |
| Z19-1        | 75411.7    | 378283 | 69        | 5203405                    | 2265        | 45.2 |
| L2-1         | 48039.2    | 397951 | 110       | 5284316                    | 2258        | 45.2 |
| L14-1        | 50977.4    | 445523 | 99        | 5046763                    | 2251        | 45.2 |
| L14-2        | 22078.9    | 100947 | 232       | 5122301                    | 2240        | 45.2 |
| L15-1        | 38272.4    | 452378 | 139       | 5319870                    | 2258        | 45.1 |
| L20-1        | 38271.1    | 452378 | 139       | 5319689                    | 2258        | 45.1 |
| L21-1        | 77814.9    | 373745 | 64        | 4980153                    | 2258        | 45.4 |
| L23-1        | 41321.1    | 289868 | 122       | 5041175                    | 2251        | 45.2 |
| L23-2        | 46244.9    | 232733 | 109       | 5040692                    | 2251        | 45.2 |
| L26-1        | 37926.7    | 264114 | 134       | 5082179                    | 2256        | 45.2 |
| L28-1        | 36284.0    | 264753 | 139       | 5043478                    | 2250        | 45.2 |
| L29-1        | 42717.0    | 289886 | 118       | 5040607                    | 2251        | 45.2 |
